1 **Inhibitory effect of *Bacillus subtilis* WL-2 and its IturinA**  
2 **lipopeptides against *Phytophthora infestans***

3 Youyou Wang<sup>a</sup> Congying Zhang<sup>a</sup> Lufang Wu<sup>a</sup> Le Wang<sup>a</sup> Wenbin Gao<sup>a</sup> Jizhi

4 Jiang<sup>a\*</sup> Yanqing Wu<sup>b\*</sup>

5 (a. College of Life Science, Hebei University, Baoding 071002, China; b. College of Biochemical

6 and Environmental Engineering, Baoding University, Baoding 071000, China)

7 First author:

8 Youyou Wang, E-mail: youyouwang989@gmail.com.

9 \*Corresponding author:

10 Jizhi Jiang, E-mail: jizhijiang909@163.com.

11 Yanqing Wu, E-mail: wuyanqing198212@126.com.

12 **KEYWORDS** Lipopeptides, IturinA, *Bacillus subtilis*, *Phytophthora infestans*,

13 Inhibition

14 **RUNNING TITLE** IturinA kill *Phytophthora infestans*

15 **ABSTRACT**

16 Potato late blight triggered by *Phytophthora infestans* ((Mont.) de Bary) represents a

17 great food security threat worldwide and is difficult to control. Currently, *Bacillus* spp.

18 have been considered biocontrol agents to control many fungal diseases. Here,

19 *Bacillus subtilis* WL-2 was selected as the antifungal strain with the most potential

20 against *P. infestans* mycelium growth. Additionally, the functional metabolites

21 extracted from WL-2 were identified as IturinA-family cyclic lipopeptides (CLPs) via

22 high-performance liquid chromatography (HPLC) and electrospray ionization mass  
23 spectrometry (ESI-MS). Analyses using scanning and transmission electron  
24 microscopy (SEM and TEM) revealed that IturinA caused a change in the mycelial  
25 surface and damage to the internal cell structure, including cell membrane disruption  
26 and irregular organelle formation. Moreover, propidium iodide staining and nucleic  
27 acid and protein release were detected to clarify the cell membrane damage caused by  
28 IturinA. Additionally, IturinA triggered reactive oxygen species (ROS) generation and  
29 malondialdehyde (MDA) production. Mitochondrial membrane potential (MMP),  
30 mitochondrial respiratory chain complexes activity (MRCCA), respiratory control rate  
31 (RCR), and oxidative phosphorylation efficiency (P/O) assays indicated that *P.*  
32 *infestans* mitochondria affected by IturinA were so seriously damaged that the MMP  
33 and MRCCA declined remarkably and that mitochondrial ATP production ability was  
34 weakened. Therefore, IturinA induces cell membrane damage, oxidative stress, and  
35 dysfunction of mitochondria, resulting in *P. infestans* hyphal cell death. As such, the  
36 results highlight that *B. subtilis* WL-2 and IturinA have great potential as candidates for  
37 inhibiting *P. infestans* mycelium growth and controlling potato late blight.

### 38 **IMPORTANCE**

39 Potato (*Solanum tuberosum* L.) is the fourth most common global food crop, and  
40 its planting area and yield increase yearly. Notably, in 2015, China initiated a potato  
41 staple food conversion strategy, and by 2020, approximately 50% of potatoes will  
42 be consumed as a staple food. The plant pathogen fungus *Phytophthora infestans*  
43 ((Mont.) de Bary) is the culprit of potato late blight; however, biological agents

44 rather than chemicals are highly necessary to control this threatening disease. In  
45 this study, we discovered an antifungal substance, IturinA, a lipopeptide produced  
46 by *Bacillus subtilis* WL-2. Moreover, our research revealed the actual mechanism  
47 of IturinA against *P. infestans* mycelium growth and clarified the potential of *B.*  
48 *subtilis* WL-2 and IturinA as a biocontrol agent against *P. infestans* mycelium growth  
49 as well as for controlling the development of late blight in potato cultivation.

50

51

52

53

54

55

56

57

58

59

60

61

62

63

64

## 65 INTRODUCTION

66 Behind rice, wheat, and corn, potato (*Solanum tuberosum* L.) is the fourth most  
67 stable food crop in the world. However, potato production is often endangered by  
68 many pathogens. Worryingly, late blight triggered by *Phytophthora infestans* ((Mont.)  
69 de Bary) could directly reduce or even eliminate potato production, and an outbreak  
70 of this disease could even result in a grievous economic loss in the agriculture  
71 industry(1, 2). At present, controlling late blight is achieved mainly using  
72 disease-resistant varieties and spraying chemical pesticides(3). However, due to the  
73 rapid variability of *P. infestans* and increase in physiological complexity of races,  
74 superphysiological races (R1-R11), which can overcome all the late blight protection  
75 genes (1.2.3.4.5.6.7.8.9.10.11), have emerged(4, 5). Additionally, as the result of the  
76 excessive use of chemicals, resistance of *P. infestans* to chemical pesticides has  
77 become increasingly common. In summary, the chemicals used have posed a massive  
78 challenge to control potato late blight and resulted in a great threat to food safety and  
79 the ecological environment(6). Therefore, exploration of suitable measures to control  
80 potato late blight is urgent. Surprisingly, biocontrol agents (BCAs), including  
81 microorganisms and secondary metabolites, have been further researched and even  
82 considered promising and environmentally friendly alternatives to the chemicals(7).  
83 With biocontrol method development, various antibiotic peptides, including  
84 polymyxin, daptomycin, chromobactomycin, subtilin and subtilisin, which were all  
85 extracted from *Bacillus* spp., have been considered potential future drugs based on  
86 their broad range of antibiotic activity, reduced toxicity, and safety to our

87 environment(3, 7, 8).

88 With obvious biocontrol properties, cyclic lipopeptides (CLPs) synthesized from  
89 *Bacillus* spp. have been a focus of research in recent years. Additionally, CLPs with a  
90 wide range of antibacterial activities are one of the most abundant and highly yielded  
91 metabolites from *Bacillus* spp.(9). For its structure, CLPs consists of a peptide cycle  
92 composed of different amino acid arrangements and a lipid component composed of  
93 fatty acid chains of different lengths, and its molecular weight is approximately 1.1  
94 kDa to 1.5 kDa(3). The structure of the peptide cycle combines with a long fatty acid  
95 chain to produce an amphiphilic trait, which determines the most suitable target sites  
96 on the cellular membranes(10). In addition, due to its variety and the number of amino  
97 acids as well as the diversity of fatty acid chain length, CLPs have multiple  
98 homologs(11). Moreover, CLPs derived from *Bacillus* spp. can be classified into three  
99 main subfamilies: iturin, surfactin, and fengycin(11-13). Interestingly, surfactin has  
100 powerful antiviral activities but low activities against bacteria and fungi(14), while  
101 iturin and fengycin exhibit an obvious antifungal activity against a range of filamentous  
102 fungi(9, 15). Most of the special biocontrol mechanisms of iturin and fengycin against  
103 phytopathogens have been characterized(16). Specifically, fengycin derived from  
104 *Bacillus subtilis* BS155 has a strong antagonistic activity against *Magnaporthe grisea*  
105 by reactive oxygen species (ROS), chromatin condensation, and separation of cell  
106 walls from the membranes(17). Many results have shown that iturin can inhibit the  
107 mycelium growth of many fungi, including *Candida albicans*, *Aspergillus flavus*,  
108 *Sclerotinia sclerotiorum*, *Botrytis cinerea*, *Monilinia fructicola*, *Fusarium*

109 *graminearum* and so on(18-21). More specifically, iturin extracted from *Bacillus*  
110 *amyloliquefaciens* FZB42 could cause morphological changes in the plasma  
111 membranes and cell walls of *F. graminearum* hyphae, lead to ROS accumulation, and  
112 induce cell death in conidia (22). When iturin was used against *S. sclerotiorum*, it could  
113 also trigger a separation of cell walls from membranes and even form a pore in the cell  
114 membrane, resulting in leakage of the cytoplasm(19). Additionally, IturinA disrupted  
115 the *B. cinerea* cytoplasmic membrane; created transmembrane channels, resulting in  
116  $K^+$  leakage; prevented spore germination; and impaired mycelium development(23).  
117 CLPs produced by *Bacillus* have antiphytopathogen activities; however, the inhibitory  
118 effect of lipopeptides on *P. infestans* remains poorly understood(3). Therefore, through  
119 this study, we intended to compare the potential of three bacteria, *B. subtilis* WL-2  
120 (MK241790), *Pseudomonas fluorescens* WL-1 (MH229994) and *Bacillus pumilus* W-7  
121 (KX056277), as efficient BCAs for the control of *P. infestans* mycelium growth.  
122 Meanwhile, CLPs extracted from the bacteria were purified using high-performance  
123 liquid chromatography (HPLC) and identified using Fourier transform infrared  
124 spectroscopy (FTIR) and mass spectrometry (MS). In addition, the antifungal  
125 mechanism of CLPs on *P. infestans* mycelium growth, cell integrity, mitochondrial  
126 damage, and ROS generation were exploited to evaluate the consideration of CLPs as  
127 antifungal agents against potato late blight in the future.

128

129

130

## 131 **1 MATERIALS AND METHODS**

### 132 **1.1 Inhibition effect of three strains against *P. infestans***

133 The fungal pathogen *Phytophthora infestans* ((Mont.) de Bary) W101 was obtained  
134 from the China General Microbiological Culture Collection Center (CGMCC) and  
135 grown on rye (R) solid medium at 20°C in the dark(24). *Bacillus subtilis* WL-2  
136 (MK241790), *Pseudomonas fluorescens* WL-1 (MH229994) and *Bacillus pumilus*  
137 W-7 (KX056277) bacteria were isolated from *Capsicum frutescens* leaves and  
138 cultured on Luria Bertani (LB) solid medium at 35°C(25). Living cell (LC) of bacteria  
139 was grown on LB solid medium and incubated for 24 h at 37°C. To obtain cell  
140 suspension (CS), LB liquid medium was inoculated with each strain and incubated for  
141 20 h at 37°C and 200 rpm, and the final concentration ( $1 \times 10^7$  CFU/mL) was regulated  
142 by distilled water. Prepared 2% seed culture (SC,  $1 \times 10^7$  CFU/mL) were transformed  
143 into flasks containing 100 mL of LB liquid medium and incubated at 30°C and 200  
144 rpm for 96 h. Finally, the liquid culture was centrifuged ( $10,000 \times g$ , 4°C) for 10 min,  
145 and LC were filtered using cellulose acetate membranes (0.22  $\mu$ m) to obtain a  
146 cell-free supernatant (CFS) solution (26, 27). Eight-day-old *P. infestans* mycelium  
147 was scraped into 10 mL of distilled water and oscillated to expose sporangium; then,  
148 the sporangium suspension was regulated to  $1 \times 10^7$  CFU/mL using distilled water.  
149 Finally, the sporangium suspension was released at 10°C for 3 h to obtain zoospores,  
150 and the zoospore solution was regulated by sterile water up to  $1 \times 10^7$  CFU/mL for  
151 further analysis(28).

152 The inhibitory effect of the three strains on the growth of *P. infestans* mycelium was

153 assessed on LC, CS, and CFS using the plate dual culture method(29). First, a *P.*  
154 *infestans* mycelium disk (diameter = 7 mm) was placed on the center of R solid  
155 medium (diameter = 9 cm) and cultivated for three days in advance. Then, LC was  
156 placed at a position 3 cm away from the center disk, and an equal volume of blank LB  
157 liquid medium was placed as the control. Additionally, the punch method(24) was  
158 adopted to determine the inhibitory effect of CS and CFS. Similarly, every punch (9  
159 mm) was added with 100  $\mu$ L of CS and CFS, and an equal volume of blank LB liquid  
160 medium was added as the control. Finally, after coincubation at 20°C for five days,  
161 the inhibitory zones (mm) were measured using the cross method(24), and the  
162 inhibition rate was determined by the described formula:

163 
$$\text{Inhibition rate (\%)} = (C - T) / C \times 100(30)$$

164 Where C represents the fungal colony radius of the control, and T symbolizes the  
165 radius of the treatment group.

## 166 **1.2 Biocontrol assays for the WL-2 strain**

167 A potato-sensitive variety of “Bintje” was used to prepare *in vitro* tuber slices (2.0  
168 cm×2.0 cm×0.5 cm) and healthy leaves(31). Treatment measures, such as disease  
169 prevention (DP), simultaneous inoculation (SI), and disease therapy (DT), were  
170 conducted to evaluate the biocontrol effect of the WL-2 strain. For DP, a CS ( $1 \times 10^6$   
171 CFU/mL, 50  $\mu$ L per slice) was smeared over the potato tuber slices and leaves at  
172 room temperature in advance. Then, an equal volume of blank LB liquid medium was  
173 smeared as the control. After 48 h, a *P. infestans* mycelium disk (diameter =7 mm)  
174 was placed on the top of the tubers, and the *P. infestans* zoospore suspension ( $1 \times 10^7$



175 CFU/mL, 20  $\mu$ L per slice) was added at the back of the leaves. Finally, tuber slices  
176 were cultured for six days after inoculation at 20°C in the dark, and the leaves were  
177 cultured for six days after inoculation at 20°C in a 16 h light/8 h dark photocycle. For  
178 SI, the CS and *P. infestans* were inoculated at the same time. For DT, *P. infestans* was  
179 inoculated two days in advance, and then the CS was processed(32). Based on a 1-9  
180 scale, the disease index was calculated according to the following formula:

$$181 \text{ Disease index} = \sum(d_i \times l_i) / (L \times N) \times 100(30, 33)$$

182 Where  $d_i$  represents the disease grade, and the number of leaves or tubers at different  
183 grades were represented with  $l_i$ . L symbolizes the sample number, and N indicates the  
184 highest disease grade.

### 185 **1.3 Detection of CLPs production ability and preparation of crude lipopeptide** 186 **extract (CLE)**

187 **(1): Identification of hemolysis ability.** To determine the hemolysis characteristics of  
188 CLPs, the WL-2 strain was inoculated on sheep blood medium at 37°C for 48 h to  
189 detect hemolysis activity, and inoculation of *Escherichia coli* (without hemolysis  
190 ability) was used as a control(34). **(2): CFS surface tension (ST).** CFS was detected  
191 every 12 h for 96 h (8 times), and ST was recorded with a tensiometer (Gibertini,  
192 Milan, Italy) using the Wilhelmy plate method(35). The instrument was calibrated  
193 against distilled water (ST = 73.1 mN/m) for accurate measurements(36). **(3): Oil**  
194 **dispersal diameter measurement(37).** Soybean oil (1 mL) was added above the  
195 surface of distilled water (30 mL, 4°C), and then a white oil film on the distilled water  
196 surface was formed. WL-2 CFS (50  $\mu$ L) was added to the center of the oil film to

197 record the diameter of the oil dispersal ring. Meanwhile, blank culture solution was  
198 used as a control. **(4): Emulsification index determination**(38). CFS (3 mL) and  
199 soybean oil (3 mL) were mixed in a tube, and then the mixture was treated with an  
200 ultrasonic cleaning instrument (SK2510, KUDOS, Shanghai, China) for 1 min to mix  
201 thoroughly. Finally, the mixture was incubated statically for 24 h, the height of the  
202 emulsion layer was measured, and the percentage of emulsifying properties was  
203 calculated as follows:

204 
$$\text{Emulsifying properties (\%)} = (\text{emulsion layer height}/\text{total height}) \times 100(39)$$

205 The WL-2 strain inoculated into LB liquid medium was cultured at 35°C and 180 rpm  
206 for 24 h to prepare an SC ( $1 \times 10^6$  CFU/mL). Then, 3% (by vol) SC was transferred  
207 into the flask (1,000 mL) containing 400 mL of Landy liquid medium(40) and  
208 cultured at 30°C and 180 rpm for 96 h. The acid precipitation method(41) was used to  
209 prepare CLE. The culture was centrifuged ( $10,000 \times g$ , 4°C) for 10 min to remove LC.  
210 Then, 6 N HCL was added to adjust the pH of the supernatant (pH=2.0) and induce  
211 precipitation(42). Finally, the CLPs contained in the precipitation were fully dissolved  
212 in methanol, and a rotary evaporator (RE52CS-1, YARONG, Shanghai, China) was  
213 then used at 50°C and 65 rpm to obtain CLE for further analysis.

#### 214 **1.4 MALDI-TOF-MS and antifungal assays**

215 The CLE methanol solution (1 mg/L, 10  $\mu$ L) was mixed with 1  $\mu$ L of saturating  
216 matrix solution of  $\alpha$ -cyano-4-hydroxy-cinnamic acid. The matrix solution containing  
217 TFA (0.1%) was prepared using H<sub>2</sub>O and CH<sub>3</sub>CN (1:1, v/v). Based on a 20 kV  
218 accelerating voltage, the samples were detected, and matrix-assisted laser desorption

219 ionization time-of-flight mass spectrometry (MALDI-TOF-MS, AUTOFLEX III,  
220 Bruker Daltonics) was utilized to analyze the sample in positive mode. Finally, the  
221  $m/z$  values in the range from 600 to 1,700 were analyzed (16, 43-45).

222 The disk diffusion(43) method was adopted to evaluate the antioomycete activity of  
223 CLE. A *P. infestans* disk (7 mm) was incubated on R solid medium plates for three  
224 days in advance, and filter paper disks (5 mm) containing 6  $\mu$ L of CLE solution (1, 3,  
225 and 5 mg/mL) were then placed at a position 4 cm away from the center disk.  
226 Meanwhile, the same volume of the fungicide Metalaxyl (15  $\mu$ g/mL) and a methanol  
227 solution were used as the control. The plates were co-incubated at 20°C for five days,  
228 and inhibition rates were determined(30).

### 229 **1.5 HPLC and FTIR analysis**

230 Commercial standard lipopeptides (surfactin and iturin, Sigma-Aldrich, United States)  
231 and CLE methanol solution (10 mg/L) were run on an HPLC system (Waters, E2695,  
232 United States) with a C<sub>18</sub> reverse-phase column (5  $\mu$ m, 4.6  $\times$  150 mm) under the same  
233 conditions(46). Water and acetonitrile were selected as the mobile phase at a ratio of  
234 20:80 by volume. The injection volume was 1 mL per min, and the eluate was  
235 monitored at 214 nm. According to the peak times of standard lipopeptides, the peaks  
236 of potential lipopeptides contained in CLE were collected and dried at room  
237 temperature(45, 46).

238 According to the matched peaks of CLE, the functional groups presented in the CLE  
239 were determined using FTIR(47). First, 1 mg of every purified lipopeptide (matched  
240 peaks) and standard lipopeptide was ground in KBr (100 mg, spectral grade) to

241 prepare translucent pellets(48). Data from the FTIR spectrum were collected  
242 between 500 and 4,000  $\text{cm}^{-1}$ , and the characteristic absorbance peaks were  
243 analyzed(49).

#### 244 **1.6 MALDI-TOF-MS/MS and antifungal activity analysis**

245 As described in the MALDI-TOF-MS method, 1  $\mu\text{g}/\text{mL}$  purified lipopeptide methanol  
246 solutions (peak a and peak b) were detected using MALDI-TOF-MS/MS  
247 (MALDI-TOF, AUTOFLEX III, Bruker Daltonics) coupled with HCD mode to clarify  
248 the amino acid sequence in lipopeptides(50). Depending on the precursor ion of  
249 interest, a suitable collision energy was used from the range of 35 to 50 eV(51).

250 Antioomycete activity of purified surfactin and IturinA was evaluated using the disk  
251 diffusion method(43). Similarly, 6  $\mu\text{L}$  of purified surfactin and IturinA solution  
252 (dissolved in distilled water) with different concentrations (20, 30, 40 and 50  $\mu\text{g}/\text{mL}$ )  
253 was added to filter paper disks (5 mm), and distilled water was used as a control.  
254 After coincubation at 20°C for five days, the inhibition zone and inhibition rate were  
255 determined.

#### 256 **1.7 Inhibition effect of IturinA against *P. infestans***

##### 257 **(1) The recovery of *P. infestans* mycelium and sporangium after inhibition**

258 *P. infestans* marginal mycelium disks (diameter = 7 mm) inhibited by IturinA (20, 30,  
259 40, and 50  $\mu\text{g}/\text{mL}$ ) were transferred onto fresh R solid medium, and mycelium disks  
260 without inhibition were used as a control. All the treated plates were incubated at  
261 20°C for seven days in the dark, and the colony diameter and growth rate were  
262 calculated according to the formula below.

263 Recovery growth rate (%) = (The maximum colony diameter / Total days) × 100(24)

264 Meanwhile, the sporangia inhibited by IturinA (20, 30, 40, and 50 µg/mL) were  
265 separated using screen mesh (diameter = 50 µm) and adjusted to  $1 \times 10^7$  CFU/mL  
266 using distilled water. Finally, the sporangium suspension was induced to release  
267 zoospores at 4°C for 3 h in the dark, and sporangium direct germination was induced  
268 at 25°C for 5 h in the dark(52). An optical microscope (OM, BX53, OLYMPUS,  
269 Japan) was used to observe 300 spores to calculate the zoospore release rate and  
270 sporangium direct germination rate according to the formula below:

271 Release or germination rate (%) = (Total release or germination number /Number of  
272 total spores) × 100(52)

## 273 **(2) Optical microscopy (OM), Scanning Electron Microscopy (SEM) and** 274 **Transmission Electron Microscopy (TEM) observation**

275 The marginal mycelia of IturinA (50 µg/mL)-inhibited *P. infestans* were collected and  
276 washed twice in PBS (pH 7.2), and then an OM system was utilized to observe  
277 mycelium damage via morphology(24). Meanwhile, mycelia were fixed using 2.5%  
278 (v/v) glutaraldehyde (Solarbio, Beijing, China) for 24 h and dehydrated for 30 min in  
279 every step using aqueous ethanol solutions (30, 50, 70, and 90%, v/v). Then,  
280 morphological and surface changes were observed using an SEM system (JSM-7500F,  
281 JEOL, JAPAN)(53). A TEM (JEM-2100F, JEOL, JAPAN) system(53, 54) was also  
282 adopted to evaluate the structural characteristics of inhibited mycelia. Similar to  
283 above, 2.5% (v/v) glutaraldehyde was used to fix damaged mycelia, 1% (v/v) osmium  
284 tetroxide was used to fix mycelia at 20°C for 20 min, and finally, a microtome

285 (YD335, Leica, Germany) was used to prepare thick specimens (70 nm) for TEM  
286 observation.

### 287 **(3) *P. infestans* cell membrane damage induced by IturinA**

288 *P. infestans* marginal mycelia and sporangia inhibited by IturinA (50 µg/mL) were  
289 collected and washed twice with 20 mM PBS buffer (pH 7.2). Then, 30 µM  
290 propidium iodide was used to stain cells in an ice bath for 10 min. Additionally, a  
291 group without inhibition was used as a control(55). Subsequently, mycelia were  
292 observed using a filter (535 nm/615 nm) under a confocal fluorescence microscope  
293 (CFM, FV3000, OLYMPUS, Japan)(56).

294 Changes in membrane permeability caused by IturinA were investigated in a  
295 mycelium-soaked solution according to the changes in electrical conductivity and  
296 optical density at 260 nm and 280 nm. First, *P. infestans* marginal mycelia (100 mg)  
297 inhibited by IturinA (50 µg/mL) were collected into a plate and then washed twice  
298 with distilled water (20 mL). Filter paper was used to remove water drops mixed with  
299 mycelia, and then, the prepared mycelium sample was resuspended in 10 mL of  
300 distilled water. Mycelia without inhibition were treated as a control. Cell membrane  
301 permeability was determined using a conductivity meter (S7-Meter, METTLER  
302 TOLEDO, Switzerland) according to the electrical conductivity of the mycelium  
303 solution after being suspended for 0, 20, 40, 60, 80 and 100 min, respectively. A  
304 mycelium solution boiled for 10 min was considered a control group (final  
305 conductivity). Finally, the relative conductivity of the mycelium was calculated  
306 according to the following formula:

307           Relative conductivity (%) = (Conductivity/Final conductivity) × 100(57)

308   Additionally, the absorbances of the mycelium solution at 260 and 280 nm were  
309   measured by an ultraviolet-visible light detector (UV-1800, SHIMADZU, Japan)(58,  
310   59) to assess nucleic acid and protein leakage. The measurement was conducted at  
311   regular intervals of 20 min, from 0 min to 100 min (6 times), and the significant  
312   difference was compared with that of the control group(60).

### 313   **1.8 IturinA leads to the accumulation of Reactive Oxygen Species (ROS) and** 314   **Malondialdehyde (MDA) production**

315   ROS accumulation in *P. infestans* cells induced by IturinA was detected with  
316   DCFH-DA, which is commonly used to evaluate oxidative stress in cells(61). First,  
317   five *P. infestans* mycelium disks (diameter =7 mm) were transferred into a flask  
318   containing 100 mL of R liquid medium and cultured at 20°C and 180 rpm for 48 h.  
319   Afterward, IturinA (50 µg/mL, final concentration) was added to the mycelium  
320   suspension and incubated for 0, 4, 8, 12, 16, 20, and 24 h. Additionally, the  
321   ROS-inducing drug Rosup (10 µg/mL, final concentration) was used to treat for 20  
322   min and considered a positive control, while distilled water was used as a negative  
323   control. Subsequently, *P. infestans* mycelium was resuspended in PBS buffer (pH 7.2),  
324   and then 10 µM DCFH-DA was co-incubated with mycelia for 20 min. Finally, the  
325   CFM system was used to analyze fluorescence intensity(62).

326   MDA is the most important product marker of ROS, so detection of the MDA  
327   concentration was performed to assay ROS intensity and cell damage. After treatment  
328   with IturinA, mycelium was analyzed using MDA assay kits (Beyotime

329 Biotechnology, China), and the absorbance at 532 nm was measured to assay MDA  
330 production using an ultraviolet-visible light detector (UV-1800, SHIMADZU,  
331 Japan)(60).

## 332 **1.9 IturinA leads to mitochondrial damage**

### 333 **(1) Assay of Mitochondrial Membrane Potential (MMP)**

334 For determination of MMP ( $mt\Delta\psi$ ), a mitochondrion-specific lipophilic cationic  
335 fluorescence dye, JC-1, was used to assay MMP in *P. infestans* mycelium(63). Based  
336 on the results above, the ROS generation induced by IturinA reached the highest value  
337 when the incubation time was 16 h, so mycelium incubated for 16 h was collected and  
338 stained with 10  $\mu\text{g}/\text{mL}$  JC-1 in the dark for 20 min. Next, the JC-1 solution was  
339 removed(62), and the mycelium was resuspended in PBS. The fluorescence of JC-1  
340 (red fluorescence and green fluorescence) was monitored at Ex/Em = 490/525 nm and  
341 490/590 nm using a CFM system(64).

### 342 **(2) Effect of IturinA on Mitochondrial Respiratory Chain Complexes Activity** 343 **(MRCCA), Respiratory Control Rate (RCR) and Oxidative Phosphorylation** 344 **Efficiency (P/O)**

345 After inhibition by IturinA (50  $\mu\text{g}/\text{mL}$ ) for 16 h, *P. infestans* mycelia were collected.  
346 Then, 5 mL of lysis buffer was added to suspend mycelia and extract mitochondria  
347 according to the Mitochondrial Isolation Kit (Beyotime, Shanghai, China) instructions  
348 (65). Next, mitochondrial oxidative phosphorylation detection was conducted after  
349 mitochondrial disruption through four freezing ( $-80^{\circ}\text{C}$ ) and thawing ( $30^{\circ}\text{C}$ ) cycles(66,  
350 67). The MRCCA, including that of complex I-V, was measured based on the



351 absorbance decline at different values(68, 69). The oxidation rate of NADH catalyzed  
352 by complex I was evaluated according to the absorbance decline at 340 nm to reflect  
353 complex I activity. In the complex II-catalyzed succinic acid oxidation reaction,  
354 DCPIP (2,6-dichlorophenol indophenol) was used as a coloring agent, and the  
355 reduction in absorbance at 600 nm was considered the activity decline of complex II.  
356 Complex III activity was detected according to the reduction rate of ferricytochrome c  
357 by CoQ<sub>2</sub> (absorbance at 550 nm), and complex IV activity was evaluated as the  
358 cyanide-sensitive oxidation of ferrocytochrome c (absorbance at 550 nm). The activity  
359 of complex V was reflected by measuring the oxidation rate of NADH (absorbance at  
360 340 nm). Mitochondrial respiratory chain complexes I-V enzyme activity was  
361 detected according to the kit instructions (AmyJet Scientific, Wuhan, China).  
362 However, mycelia without inhibition were treated as a control.

363 One milligram of inhibited mycelium (IturinA treated for 16 h) was placed in a  
364 respirator (O2k-FluoRespirometer, Oroboros, Austria) pool containing 2 mL of  
365 respiratory solution. Then, 2 mol/L glutamic acid (10  $\mu$ L), 0.4 mol/L malic acid (5  $\mu$ L),  
366 and 2.5 mmol/L succinic acid (100  $\mu$ L) were added into the reaction pool, and  
367 subsequently, 2  $\mu$ L of 100 mmol/L adenosine diphosphate was added to obtain STATE  
368 3 respiration. At the time of ADP depletion, the respiratory rate was considered  
369 STATE 4; meanwhile, 1  $\mu$ L of 1 mmol/L rotenone and 5 mmol/L (1  $\mu$ L) antimycin A  
370 were added to inhibit respiration. Finally, the ratio of STATE 3 to STATE 4 was  
371 considered the RCR(65, 70). The ratio of ATP production to oxygen in the presence of  
372 respiring substrates and ADP was considered the P/O (71, 72). The treatment of

373 mycelium without inhibition was assayed as a control.

374 All the different treatments above were repeated three times, and the final results are  
375 shown via the average value.

## 376 **2 RESULTS**

### 377 **2.1 Comparison of the inhibition of *P. infestans* by three strains**

378 The inhibitory effect of three strains against *P. infestans* is presented in Fig. 1 and Tab.  
379 1. The LC of the three strains expressed a strong inhibitory effect on the growth of *P.*  
380 *infestans* mycelium, and all inhibition rates were above 60% (Fig. 1A, Tab. 1). In  
381 addition, the WL-2 strain had the strongest inhibitory effect (Fig. 1A-a), and the  
382 inhibition rate reached a maximum of 75.6%, which was significantly different from  
383 that of the other strains ( $P<0.05$ ). Suppression of the growth of *P. infestans* mycelium  
384 by CS was stronger than that by LC treatment for all three strains (Fig. 1A, Fig. 1B,  
385 Tab-1), and the inhibition rates were all above 80%. Meanwhile, the inhibitory effect  
386 of the WL-2 CS was the most prominent, and the inhibition rate reached a maximum  
387 of 93.7%. After inhibition by the WL-2 CS, *P. infestans* mycelium could barely grow.  
388 Additionally, in the CFS experiment, the inhibition effect (inhibition rate was 80.7%)  
389 of the WL-2 strain was significantly better than that of WL-1 and W-7 ( $P<0.05$ ).  
390 Altogether, the inhibitory effect of the WL-2 strain on the growth of *P. infestans*  
391 mycelium was significantly better than that of the other strains.

### 392 **2.2 Biocontrol effect of WL-2 CS on tubers and leaves *in vitro***

393 With the most prominent inhibition effect against *P. infestans* mycelium growth, the  
394 WL-2 CS was selected to test the biocontrol effect on *in vitro* potato tissues. After six

395 days of treatment using the CS alone, tubers (Fig. 2A-a) and leaves (Fig. 2B-a) were  
396 bright and without evident discoloration and decay, which indicated that the CS had  
397 no side effect on potato tissues. After DP, SI and DT treatments on tubers (Fig. 2A-b,  
398 c, d), the *in vitro* disease indices were 6.5, 16.2, and 35.4, respectively, which were  
399 significantly lower than those of the control (77.6,  $P<0.05$ , Fig. 2A-e). On leaves (Fig.  
400 2B), the *in vitro* disease indices of DP, SI and DT (Fig. 2B-b, c, d) were 4.3, 10.9, and  
401 25.3, respectively, which were also significantly lower than those of the control group  
402 (52.3,  $P<0.05$ ). In addition, DP treatment was the best way to control late blight, and  
403 the disease index was the lowest compared with that of the SI and DT groups.

### 404 **2.3 Detection of CLP production ability**

405 **(1) Hemolysis activity:** The WL-2 strain inoculated on a sheep blood plate produced  
406 a transparent trace around the strain colony (Fig. 3A-a), while in the control group (*E.*  
407 *coli*), there was no transparent trace (Fig. 3B-a). The transparent trace indicated that  
408 the WL-2 strain had an obvious hemolysis activity. **(2) Detection of oil dispersal**  
409 **effect:** In the treatment group (WL-2 CFS), the oil film produced a large oil dispersal  
410 ring (diameter = 4.92 cm) in the plate center (Fig. 3A-b), while the oil dispersal ring  
411 that occurred in the control group was very small (diameter = 0.85 cm, Fig. 3B-b),  
412 and there was a significant difference between the two groups ( $P<0.05$ ). **(3)**  
413 **Emulsification index:** The emulsification percentage was as high as 82.1% (Fig.  
414 3A-c) in the treatment group, while the emulsification percentage of the control group  
415 was only 18.6% (Fig. 3B-c), and there was a significant difference ( $P<0.05$ ) between  
416 the two groups. **(4) Measurement of ST:** ST properties are critical to the function of

417 CLPs(73). With increasing WL-2 incubation time, the ST value was significantly  
418 reduced, and when the incubation time was 60 h, the ST value decreased from 73.1  
419 mN/m (control) to the lowest value, 38.7 mN/m (Fig. 4).

#### 420 **2.4 MALDI-TOF-MS and antifungal assays**

421 The average yield of prepared CLE was 2.3 g/L. Lipopeptides contained in the CLE  
422 appeared at molecular weights ranging from 1,000 to 1,100 (Fig. 5). The obvious  
423 molecular weights of 1,022.68, 1,036.69, and 1,050.71 were inferred to be surfactin  
424 ( $C_{14} - C_{16}$ ) with  $H^+$  adduct ions. In addition, the peaks at 1,044.66, 1,058.67, 1,072.69,  
425 and 1,086.70 were speculated to be surfactin ( $C_{14} - C_{17}$ ) with  $Na^+$  adduct ions (Fig. 5,  
426 Tab. 2). The molecular weights of 1,065.53 and 1,079.55 were considered to be  
427 IturinA with a fatty acid chain from  $C_{14}$  to  $C_{15}$  and with  $Na^+$  adduct ions (Fig. 5, Tab.  
428 2). Based on the results above, lipopeptides of surfactin and IturinA contained in CLE  
429 were preliminarily determined.

#### 430 **2.5 Purification of CLE using HPLC system and FTIR analysis**

431 Analysis of the retention time of commercial standard lipopeptides exhibited two  
432 obvious peaks at 21.6 min (peak c, surfactin) and 23.2 min (peak d, iturin). The  
433 corresponding peaks from the CLE group were collected, which were peak a at 21.4  
434 min and peak b at 23.6 min (Fig. 7).

435 From comparison of the results for purified surfactin and standard surfactin (Fig. 8A),  
436 a strong absorbance peak from  $3,650\text{ cm}^{-1}$  to  $3,250\text{ cm}^{-1}$  with a maximum at  $3,292\text{ cm}^{-1}$   
437 signified the presence of hydrogen-bonded -OH and -NH functional groups,  
438 which are characteristics of carbon-containing compounds with amino groups(74).

439 Consecutive sharp absorbance peaks were found at 2,956, 2,925 and 2,854  $\text{cm}^{-1}$ ,  
440 which correspond to the presence of  $-\text{C}-\text{CH}_3$  vibration banding or long alkyl  
441 chains(75). The highest peak at 1,664  $\text{cm}^{-1}$  signified the presence of an amino acid  
442 zwitterion  $-\text{C}=\text{O}$ , which represented a peptide part(76). The weak absorbance peaks at  
443 1,456  $\text{cm}^{-1}$  and 1,406  $\text{cm}^{-1}$  in the absorption signals ranging from 1,350 to 1,460  $\text{cm}^{-1}$   
444 were due to the  $-\text{C}-\text{CH}_2$  and  $-\text{C}-\text{CH}_3$  group vibrations contained in aliphatic chains(77).  
445 The peak at 1,194  $\text{cm}^{-1}$  was probably due to the presence of C-O-C vibrations in  
446 esters(75, 78). The FTIR spectrum above showed that the combination of aliphatic  
447 groups with peptide moieties was a typical feature in lipopeptides. The comparison of  
448 results for purified IturinA and standard iturin (Fig. 8B) exhibited that the obvious  
449 peaks at 2,958, 2,925, 2,854, 1,458, and 1,386  $\text{cm}^{-1}$  signified the aliphatic chains, and  
450 the peptide part was represented by the peaks at 3,307, 1,654, 1,541, and 1,205  $\text{cm}^{-1}$ .

## 451 **2.6 MS/MS analysis of purified lipopeptides and comparison of their** 452 **antioomycete activities**

453 The fraction of peak a was subjected to MALDI-TOF-MS, and the  $m/z$  signals  
454 ranging from 1,000 to 1,100 were hypothesized to be produced by surfactin with fatty  
455 acid chains ranging in length from  $\text{C}_{14}$  to  $\text{C}_{17}$  (Fig. 9A, Tab. 4). In detail, the ion peaks  
456 at  $m/z$  1,022.68, 1,044.66 and 1,060.68 were hypothesized to be the  $[\text{M}+\text{H}]^+$ ,  
457  $[\text{M}+\text{Na}]^+$  and  $[\text{M}+\text{K}]^+$  adducts for surfactin  $\text{C}_{14}$  (1,022), and the ion peaks at  $m/z$   
458 1,036.69  $[\text{M}+\text{H}]^+$ , 1,058.67  $[\text{M}+\text{Na}]^+$  and 1,074.64  $[\text{M}+\text{K}]^+$  were assumed to be  
459 surfactin  $\text{C}_{15}$  (1,036). In addition, the ion peaks at  $m/z$  1,050.71  $[\text{M}+\text{H}]^+$ , 1,072.69  
460  $[\text{M}+\text{Na}]^+$  and 1,088.66  $[\text{M}+\text{K}]^+$  were considered surfactin  $\text{C}_{16}$  (1,050). Additionally,

461 Na<sup>+</sup> and K<sup>+</sup> adduct ions of surfactin C<sub>17</sub> (1,064) were deduced from *m/z* values of  
462 1,086.69 and 1,102.68, respectively. Furthermore, MALDI-TOF-MS results of peak b  
463 with intense signals in the *m/z* range from 1,000 to 1,100 signified ions characteristic  
464 of IturinA C<sub>14</sub> and IturinA C<sub>15</sub> (Fig. 9B, Tab. 4). The peak series at *m/z* 1,043.55  
465 [M+H]<sup>+</sup>, 1,065.53 [M+Na]<sup>+</sup> and 1,081.56 [M+K]<sup>+</sup> was suggestive of IturinA C<sub>14</sub>  
466 (1,043), and Fig. 8B also showed ion peaks at *m/z* 1,057.57 [M+H]<sup>+</sup>, 1,079.55  
467 [M+Na]<sup>+</sup> and 1,093.56 [M+K]<sup>+</sup>, which all represented isoforms of IturinA C<sub>15</sub>  
468 (1,057).

469 The amino acid sequences of the molecules of interest were detected using MS/MS.  
470 Fig. 9C illustrates the MS/MS spectrum of surfactin C<sub>14</sub> at *m/z* 1,044.66 [M+Na]<sup>+</sup>.  
471 The series of b<sup>+</sup> ions at *m/z* 931→818→703→604→378 (-H<sub>2</sub>O, 360) signified the  
472 loss of Leu, Asp, Val, and Leu-Leu/Ile at peptide bonds, and the ions at *m/z* 360 were  
473 the C terminus of a β-OH fatty acid combined with Glu. Starting from the y<sup>+</sup> end,  
474 ions at *m/z* 267→481→594→707 represented the peptide bonds connected by  
475 Leu/Ile-Leu, Asp-Val, Leu, and Leu/Ile, respectively, so ions at *m/z* 707 were the total  
476 mass of ion fragments containing Leu/Ile-Leu-Val-Asp-Leu-Leu/Ile. The MS/MS  
477 spectrum exhibiting b<sup>+</sup> and y<sup>+</sup> fragment ions confirmed that the structure of surfactin  
478 C<sub>14</sub> was β-OH fatty acid-Glu-Leu/Ile-Leu-Val-Asp-Leu-Leu/Ile. The structure of  
479 surfactin C<sub>15</sub> at *m/z* 1,058.67 [M+Na]<sup>+</sup> was determined by the result of Fig. 9D. Similar  
480 to above, the series of y<sup>+</sup> ions at *m/z* 154→267→382→481→594→707 represented  
481 the connection of amino acids Leu/Ile, Leu, Asp, Val, Leu, and Leu/Ile, respectively.  
482 From the perspective of the b<sup>+</sup> fragment, ions at *m/z* 945→832→717→618→391

483 illustrated the loss of Leu, Asp, Val, and Leu-Leu/Ile from the end of the C terminus,  
484 and the ions at  $m/z$  391 were  $\beta$ -OH fatty acid connected with Glu. Meanwhile, the  
485 MS/MS spectrum of surfactin C<sub>16</sub> at  $m/z$  1,072.69 [M+Na]<sup>+</sup> is represented in Fig. 9E.  
486 The set of y<sup>+</sup> fragment ions was the same as those of surfactin C<sub>14</sub> and surfactin C<sub>15</sub>,  
487 with the sequence of Leu/Ile-Leu-Val-Asp-Leu-Leu/Ile at the end of the N terminus.  
488 As a result of the b<sup>+</sup> part, the most significant ion series at  $m/z$  406 (-H<sub>2</sub>O, 388)  
489 confirmed the structure of  $\beta$ -OH fatty acid (C<sub>16</sub>) connected with Glu. Additionally, the  
490 y<sup>+</sup> fragment ions that occurred in Na adducted ions, which were found at  $m/z$  1,086.69  
491 (C<sub>17</sub>, Fig. 9F), signified the same peptide connection in surfactin C<sub>14-16</sub>. The b<sup>+</sup>  
492 fragment ions at  $m/z$  973 explained the sequence of  $\beta$ -OH fatty acid  
493 (C<sub>17</sub>)-Glu-Leu/Ile-Leu-Val-Asp-Leu, and the ions at  $m/z$  973→860 were the result of  
494 losing a Leu. In summary, the MS/MS spectrum peaks at  $m/z$  1,044.66 (Fig. 9C),  
495 1,058.67 (Fig. 9D), 1,072.69 (Fig. 9E), and 1,086.69 (Fig. 9F) were detected as the  
496 same subfamily (surfactin) but had a difference of 14 Da (-CH<sub>2</sub>-). The MS/MS  
497 spectrum of peak b (IturinA) is shown in Fig. 9G-H. IturinA at  $m/z$  1,065.53 [M+Na]<sup>+</sup>  
498 was analyzed in Fig. 9G. In detail, the b<sup>+</sup> fragment ions at  $m/z$  186→300→428  
499 represented the sequence of Tyr-Asn-Gln, and ions at  $m/z$  186 ions derived from a  
500 Tyr. In addition, the series of y<sup>+</sup> ions at  $m/z$  563→449→362 signified the cleavage  
501 and loss of Asn, Asp and Ser, respectively. The most significant ions at  $m/z$  362  
502 supported the fragment of  $\beta$ -OH fatty acid (C<sub>14</sub>)-Asn, and ions at  $m/z$  563 illustrated  
503 the sequence of Asn-Ser- $\beta$ -OH fatty acid-Asn. Fig. 9H shows the detection of IturinA  
504 at  $m/z$  1,079.55 [M+Na]<sup>+</sup>. First, y<sup>+</sup> fragment ions at  $m/z$  300→414→653 symbolized

505 the connection of Tyr-Asn, Asn and  $\beta$ -OH fatty acid, and ions at  $m/z$  239 ( $653 - 414 =$   
506 239) matched exactly the fragment ion mass of  $\beta$ -OH fatty acid ( $C_{15}$ ). In addition, the  
507  $b^+$  ion fragments in the order of  $m/z$  248, 362, 431, and 670 illustrated the sequence of  
508 Gln-Pro-Asn-Ser- $\beta$ -OH fatty acid. The results of Fig. 9G-H demonstrate IturinA  $C_{14}$   
509 and IturinA  $C_{15}$  with a difference of 14 Da ( $-CH_2-$ ) and represent the structure of  
510  $\beta$ -OH fatty acid-Asn-Tyr-Asn-Gln-Pro-Asn-Ser.

511 The antioomycete activity results (Fig. 10 and Tab. 5) showed that surfactin had no  
512 inhibition activity on the growth of mycelium and that there were no obvious  
513 inhibition zones at even the concentration of 50  $\mu\text{g/mL}$  (Fig. 10A). However, the  
514 inhibitory effect was clearly dependent on the increasing concentration of IturinA (Fig.  
515 10B). IturinA at the concentration of 50  $\mu\text{g/mL}$  produced the best inhibition effect,  
516 and the inhibition zone reached a maximum of 10.5 mm (Fig. 10B-d). There was a  
517 significant difference between IturinA and the control ( $P < 0.05$ ).

## 518 **2.7 Inhibition effect of IturinA against *P. infestans***

### 519 **(1) The recovery of *P. infestans* mycelium and sporangium after inhibition**

520 After inhibiting with IturinA (20, 30, 40, and 50  $\mu\text{g/mL}$ ), *P. infestans* mycelia  
521 recovered to grow (Fig. 11A, b-e) at a lower rate (7.1 mm/d, 5.3 mm/d, 3.2 mm/d, and  
522 2.7 mm/d, respectively) than that of control (10.7 mm/d), and there were significant  
523 differences between IturinA treatments and the control ( $P < 0.05$ ). The results above  
524 signified that the concentration of IturinA was positively correlated with the degree of  
525 mycelium damage. After the inhibition of IturinA at the concentration of 50  $\mu\text{g/mL}$ ,  
526 the mycelium recovery rate exhibited the lowest value (only 2.7 mm/d, Fig. 11B).



527 Meanwhile, zoospore release and sporangium direct germination rates were calculated,  
528 and the results showed that with the IturinA concentration increasing from 20 to 50  
529  $\mu\text{g/mL}$ , zoospore release and sporangium direct germination rates declined  
530 significantly. In detail, the zoospore release rate declined from 64.9% to 18.6%, and  
531 the sporangium direct germination rate decreased from 48.9% to 14.4% (Fig. 11C).  
532 The lowest zoospore release rate (18.6%) and sporangium direct germination rate  
533 (14.4%) that occurred after treatment with the highest IturinA concentration (50  
534  $\mu\text{g/mL}$ ) were significantly different from those of the control (64.9% and 48.9%,  
535 respectively,  $P < 0.05$ ).

## 536 **(2) Observation using OM, SEM and TEM**

537 Under the OM examination, the mycelia in the control group (Fig. 12A-a) were  
538 smooth, vimineous, straight, and evenly grown. The mycelia affected by IturinA (50  
539  $\mu\text{g/mL}$ ) exhibited a series of deformations (Fig. 12A, b-e). After treatment with  
540 IturinA, some mycelia twisted into clusters (Fig. 12A-b), some others grew with  
541 unequal widths, and abnormal branches were observed frequently (Fig. 12A-c). In  
542 addition, many mycelia lost smoothness and formed unusual surface bulges (Fig.  
543 12A-d), the inner mycelium developed large vacuoles, and the cytoplasm condensed  
544 unevenly (Fig. 12A-e). An SEM system was used to observe mycelium deformation in  
545 shapes and appearances. The results showed that the mycelia in the control group  
546 were straight and smooth without any expansion (Fig. 12B-a). However, in the  
547 treatment group, mycelia were rough and uneven on the surface (Fig. 12B-b). In  
548 addition, mycelia were locally raised, with an uneven width (Fig. 12B-c,d). Expansion

549 in branches (Fig. 12B-e) and even abnormal branches appeared in parts of the  
550 mycelium (Fig. 12B-f). The TEM method was used to examine the structural variation  
551 within cells. The results showed that normal mycelial cell membranes were intact,  
552 organelles within the cells were distributed in a normal arrangement, and  
553 mitochondria, including inner ridges, were abundant (Fig. 12C-a). After treatment  
554 with IturinA (50  $\mu\text{g}/\text{mL}$ ), the same mycelial cell membranes were disrupted (Fig. 12C,  
555 b-d), and organelles within the cell were disordered (Fig. 12C-b). A large area of  
556 cavitation appeared in the center of the cytoplasm (Fig. 12C-b,d), and mitochondria  
557 and ridges were sparse (Fig. 12C-b) compared with those of the control. Moreover,  
558 irregular organelle shapes with unclear boundaries and obvious accumulation bodies  
559 were also visible in some cells (Fig. 12C-c). Furthermore, organelles within some  
560 cells gathered in clumps, and the nuclei affected by cavitation shifted to the cell edge  
561 (Fig. 12C-d).

### 562 **(3) Effects of IturinA on the cell membrane**

563 Cell membrane integrity of *P. infestans* mycelium were examined using propidium  
564 iodide. The results showed that after treatment with IturinA (50  $\mu\text{g}/\text{mL}$ ), hyphae  
565 (Fig. 13A-b) and sporangia (Fig. 13A-d) displayed obvious red fluorescence  
566 compared with those of the control (Fig. 13A-a, c), which indicated that IturinA  
567 could result in substantial cell membrane defects and cell death. Meanwhile, the  
568 red fluorescence rate that was exhibited in the sporangium was approximately  
569 68% in the treatment group, while in the control group, the red fluorescence rate  
570 was lower and only 21%.

571 The effect of IturinA on cell membrane permeability was shown in Fig. 14A. The  
572 relative conductivity of the control increased from 9.7% to 19.6% at 60 min. However,  
573 in the treatment (IturinA) group, relative conductivity improved from 10.2% at the  
574 beginning to 41.8%. In addition, the maximum relative conductivity of the treatment  
575 group (44.6%) was twice as high as that of the control group (20.9%). Leakage of  
576 nucleic acids revealed that at the soaking time of 100 min, the absorbance value  
577 reached a maximum of 0.251, which was significantly higher than that of the control  
578 group (the highest absorbance value was 0.059, Fig. 14B,  $P<0.05$ ). In addition,  
579 detection of protein leakage showed that the highest absorbance value (0.410)  
580 appeared at 60 min, and the maximum absorbance of the treatment group was  
581 significantly higher than that of the control group ( $P<0.05$ ), which had a maximum  
582 absorbance value of only 0.043 (Fig. 14C).

### 583 **2.8 ROS and MDA production**

584 We hypothesized that IturinA application could lead to ROS generation, which is an  
585 important intermediate in the progression of *P. infestans* cell damage(79). While  
586 investigating this possibility, we observed a significant increase in intracellular ROS  
587 using DCFH-DA. As shown in Fig. 15, with increasing time of IturinA (50  $\mu\text{g/mL}$ )  
588 treatment, the mean fluorescence intensity became obviously enhanced (Fig. 15A-B).  
589 In detail, the fluorescence intensity in treatment group was significantly higher than  
590 that in the control group after 4 h of generation ( $P<0.05$ ). In the treatment group, the  
591 highest fluorescence intensity was four times higher than that in the control after 16 h  
592 of generation ( $P<0.05$ ), and there was no significant difference between IturinA

593 treatment and the positive control (Fig. 15A-B,  $P<0.05$ ). In addition, the  
594 concentration of MDA produced by ROS reaction from 8 h to 24 h in the treatment  
595 group was significantly higher than that in the control group (approximately 20  
596  $\mu\text{mol/L}$ ,  $P<0.05$ ), and the highest MDA concentration reached a maximum of 152  
597  $\mu\text{mol/L}$  after 16 h of IturinA activity (Fig. 15C).

## 598 **2.9 Mitochondrial damage**

### 599 **(1) Assay of MMP**

600 The effect of IturinA on the MMP of *P. infestans* mycelium was detected using JC-1  
601 staining and fluorescence microscopy. As shown in Fig. 16, the control group  
602 exhibited an obvious red fluorescence distribution (Fig. 16A-b) and J-aggregates  
603 (orange) in mitochondria (Fig. 16A-d). Compared with the control mycelia,  
604 IturinA-treated mycelia stained with JC-1 displayed dramatically changed  
605 fluorescence patterns and clear green fluorescence (Fig. 16B-c). These results  
606 indicated that IturinA could lead to a decrease in MMP.

### 607 **(2) MRCCA, RCR and P/O**

608 The activities of complexes I-V were detected in this experiment, and the results are  
609 shown in Fig. 17A-E. Affected by IturinA, the activities of complex I-V respiratory  
610 enzymes were reduced remarkably and were approximately 61%, 35%, 43%, 31%, and  
611 38%, respectively, which were significantly different from those of the control group  
612 ( $P<0.05$ ). Meanwhile, the RCR and P/O values in the control group were 95% and 2.7,  
613 respectively, and in contrast, those in the treatment group were 63% and 1.9,  
614 respectively, which were significantly lower than those in the control group (Fig.

615 17F-G,  $P < 0.05$ ).

## 616 **DISCUSSION**

617 The increasing production of potatoes is still facing significant losses because of the  
618 infection of fungi, oomycetes, bacteria, insects, and viruses(80, 81). Among these  
619 pathogens, the *P. infestans* oomycete is the culprit of potato late blight, which is the  
620 disease that is the most serious and has the largest economic loss(1). The control of  
621 potato late blight based on the massive use of BCAs, including microorganisms and  
622 secondary metabolites, could be a potential measure to relieve or overcome the  
623 problem of food safety, environmental protection and disease resistance resulting  
624 from chemicals(7). Some *Bacillus* and *Pseudomonas* species are considered the best  
625 potential candidates used as BCAs because of their diversity, survival ability in  
626 various environments, and their variety of biocontrol molecules(82, 83). Additionally,  
627 as the result of massive number of bioactive compounds involved in their antagonistic  
628 activity, *Bacillus* and *Pseudomonas* species also have numerous interesting properties  
629 for industry and agriculture(84). In this study, we compared the inhibitory effects of  
630 LC, CS, and CFS from three bacterial species, *B. subtilis* WL-2, *P. fluorescens* WL-1,  
631 and *B. pumilus* W-7, against *P. infestans* mycelium growth. The inhibition effect of  
632 WL-2 was overall significantly better than that of the other strains. Although the  
633 biocontrol strains exhibited a strong antifungal effect in a plate confrontation test, the  
634 biological control effect in the *in vitro* experiment was still worrying due to the  
635 environmental changes(85). Based on previous experience, we suspect that  
636 antagonistic strains themselves are destructive to potato tissues(86). Therefore, in this

637 study, the WL-2 strain was selected to test the effect of controlling potato late blight  
638 on tissues *in vitro*. The results indicated that the WL-2 strain had an obvious ability to  
639 prevent late blight development on tissues *in vitro* and had no side effect on potato  
640 tissues.

641 In fact, CLPs with a wide range of antibacterial activities are some of the most  
642 abundant and highly yielded metabolites from *Bacillus*(9). In addition, the peptide  
643 cycle with 7 ~ 10 amino acids combined with a lipid component ( $\beta$ -hydroxy fatty acid  
644 chain or  $\beta$ -amino fatty acid chain) determines that CLPs are amphiphilic  
645 compounds(3). Furthermore, the hemolysis, oil dispersal, and emulsification  
646 activities(34, 37, 38) could be preliminarily detected to demonstrate the capability of  
647 CLPs secretion. The obvious transparent trace (Fig. 3B-a), large oil dispersal ring  
648 (diameter = 4.92 cm), high percentage of emulsification (82.1%), and decline in ST  
649 indicated that the WL-2 strain had a strong ability to produce CLPs. With the  
650 character that CLPs aggregate and precipitate at the condition of pH = 2, the acid  
651 precipitation method(41) was used to prepare CLE. CFS obtained from *Bacillus*  
652 species possesses various bioactive substances, such as polysaccharides, proteins,  
653 lipids, and peptides(87); however, whether CLE has the ability to inhibit *P. infestans*  
654 mycelium growth should be further investigated. In this study, our results showed that  
655 when the CLE concentration was 5 mg/mL, the obvious inhibition zone reached a  
656 maximum of 9.3 mm.

657 Based on the obvious inhibitory effect of various homologous subfamilies contained  
658 in CLPs, it was extremely meaningful to determine the CLPs classification and clarify

659 the molecular mechanism of *P. infestans* inhibition. In this part, by comparison with  
660 standard lipopeptides, we showed the same retention time via HPLC detection and the  
661 same absorption peaks pattern in FTIR analysis, demonstrating that both subfamilies  
662 of surfactin and IturinA were presented in the CLE. Additionally, in the FTIR  
663 spectrum, the aliphatic groups observed at 2,958, 2,925, 2,854, 1,458, and 1,386  $\text{cm}^{-1}$   
664 were connected with the peptide parts exhibited at 3,307, 1,654, 1,541, and 1,205  $\text{cm}^{-1}$ ,  
665 indicating that the purified CLPs of surfactin and IturinA possess an amphiphilic  
666 trait(75, 77, 78). Further study was conducted using MS/MS technology to detect the  
667 specific molecular weight and structural formula according to the amino acid numbers  
668 and sequence(16). The results showed that the chemical structural formula of purified  
669 surfactin was  $\beta$ -OH fatty acid-Glu-Leu/Ile-Leu-Val-Asp-Leu-Leu/Ile with a fatty acid  
670 chain from C<sub>14</sub> to C<sub>17</sub>. The purified IturinA with ions characteristic of IturinA C<sub>14</sub> and  
671 IturinA C<sub>15</sub> had a structure of  $\beta$ -OH fatty acid-Asn-Tyr-Asn-Gln-Pro-Asn-Ser.  
672 However, based on previous results, *B. amyloliquefaciens* S76-3 could produce the  
673 CLPs PlipastatinA and IturinA(51); *B. amyloliquefaciens* PGPBacCA1 could produce  
674 surfactin, IturinA and fengycin(88), and *B. subtilis* BS155 has the ability to produce  
675 surfactin and fengycin(17). We found that the CLP types produced by different  
676 antagonistic strains exhibited a great diversity. In addition, environmental factors,  
677 such as pathogens, temperature, and carbon and nitrogen sources, could also affect the  
678 classification, production and proportion of different CLP subfamilies to change the  
679 antagonistic effect(49, 89).

680 Iturin and fengycin produced by *Bacillus* spp. are known to exhibit direct antifungal

681 activity(83, 90, 91), and their fungal toxicity mechanisms are involved in pore  
682 formation in the cell membrane(9, 92). Similarly, a CLP with 9 amino acids produced  
683 by *P. fluorescens* SBW25 has direct antioomycete activities and results in  
684 immobilization and subsequent lysis of *P. infestans* zoospores(93, 94). However, the  
685 specific inhibitory effects of surfactin and iturin against *P. infestans* remain unclear.  
686 After defining the types of CLPs in this research, the inhibition mechanisms of  
687 IturinA and surfactin against *P. infestans* were the most important issues to explore in  
688 this research.

689 Subsequently, our results showed that surfactin had no direct inhibition activity on  
690 the growth of *P. infestans* mycelium (Fig. 10A), which is similar to reports that  
691 surfactin alone lacks antifungal activities(14, 17, 89). However, some research results  
692 indicated that the surfactin family produced by *Bacillus* spp. has an indirect  
693 antagonistic activity by triggering induced systemic resistance (ISR) in plant(95-97).  
694 This indirect activity of surfactin on potato plants against late blight should be  
695 investigated as a meaningful work in the future. Most interesting to us was the fact  
696 that after direct inhibition with IturinA (50 µg/mL), the inhibition zone against *P.*  
697 *infestans* mycelium growth reached a maximum of 10.5 mm (Fig. 10B-e), and the  
698 lowest zoospore release and sporangium direct germination rate were only 18.6% and  
699 14.4%, respectively. These results corresponded to the report that the fengycin family  
700 produced by *P. fluorescens* SBW25 has a specific inhibitory effect on *P. infestans*  
701 zoospore activity through zoospore membrane solubilization(94). In fact, the  
702 inhibited *P. infestans* mycelium must be in a damaged state; however, the specific



703 injury mechanisms caused by IturinA remain unclear. Just as former articles reported  
704 that Iturin produced by *Bacillus* species exhibited direct fungal toxicity involving cell  
705 membrane damage and pore formation in the plasma membrane(9, 92), in this  
706 research, we found that the affected *P. infestans* mycelia were rough and uneven on  
707 the surface (Fig. 12B-b), and that unusual surface bulges (Fig. 12A-d) were formed in  
708 the mycelia. Much of the changes in mycelial appearance are probably due to the  
709 damage of the internal cell structure(53, 54). Next, our TEM results showed that the  
710 inhibited cell membranes were disrupted (Fig. 12C, b-d), organelles adopted an  
711 irregular shape (Fig. 12C-c) and were disordered (Fig. 12C-b), and a large area of  
712 cavitation appeared in the center of the cytoplasm (Fig. 12C-b,d). All the OM, SEM  
713 and TEM analysis results were basically similar to previous findings, with a report  
714 that *F. graminearum* mycelium affected by IturinA derived from *B. amyloliquefaciens*  
715 S76-3 displayed severe morphological changes, including mycelium distortions, cell  
716 membrane leakage, and separation of the plasma membrane from the cell wall(51). In  
717 contrast with reported cellular content inactivation and branch formation  
718 inhibition(51), in our research, many tiny and irregular branches (Fig. 12A-c)  
719 stretched to the surrounding environment to evade the toxic effects of IturinA.

720 Moreover, the cell membrane damage probably led to the release of nucleic acids and  
721 protein from the cell and directly changed the relative conductivity of the  
722 mycelium-soaked solution(60). Additionally, the fluorescent dye propidium iodide is a  
723 kind of nucleus-staining reagent, and the red fluorescence displayed by propidium  
724 iodide can distinguish damage of the cell membrane from an intact membrane present

725 in a living state (17). In this part, our results showed that IturinA results in *P.*  
726 *infestans* mycelium cell membrane defects and cell death, that the inhibited hyphae  
727 (Fig. 13A-b) and sporangia (Fig. 13A-d) displayed red fluorescence, and that the  
728 ratio of sporangia with red fluorescence reached a maximum of 68%. In addition,  
729 when inhibited by IturinA, the released protein and nucleic acids increased the  
730 relative conductivity of the mycelium-soaked solution to approximately two times  
731 higher than that of the control (Fig. 14).

732 Intracellular chaos caused by long-term adversity could also induce ROS generation  
733 in cells to adapt to the adverse environment(54). The ROS generation caused by  
734 detrimental conditions is an important intermediate in the progression of cell  
735 damage(62). In our research, ROS detection results showed that after 4 h of exposure  
736 to IturinA, the highest ROS generation was four times as high as that of the control.  
737 In addition, the highest MDA concentration reached a maximum of 152  $\mu\text{mol/L}$  after  
738 16 h of treatment. However, possibly because MDA is a subsequent product of ROS  
739 generation, the highest values of ROS generation and MDA concentration did not  
740 appear at the same time(60, 98). In addition, when living in harsh environments and  
741 affected by ROS generation, mitochondria might develop an abnormal state, in which  
742 the cell respiratory process is obstructed, and the power plants needed for cell life  
743 might have abnormal working conditions(63, 70-72). During ROS generation, the  
744 accumulation of oxidized products could also lead to MRCCA decline and electron  
745 transport chain dysfunction resulting in an immature respiration process, which  
746 ultimately leads to a decrease in P/O(65, 70-72).

747 In this study, JC-1 staining showed that IturinA leads to a decrease in MMP in *P.*  
748 *infestans* cells. The respiratory enzyme activity of complexes I-V declined by  
749 approximately 61%, 35%, 43%, 31%, and 38%, respectively (Fig. 17A-E).  
750 Meanwhile, the RCR and P/O values were only 63% and 1.9, respectively, which  
751 were significantly lower than those of the control (Fig. 17F-G,  $P < 0.05$ ). Energy  
752 production is closely related to mitochondrial function and oxidative phosphorylation  
753 processes(80). Therefore, the decline in MMP and MRCCA in *P. infestans* and the  
754 weakness of ATP production in *P. infestans* mitochondria strongly indicated that  
755 IturinA resulted in serious mitochondrial damage that affected cellular respiratory state.  
756 Taken together, these data clarified that the WL-2 strain can produce the CLPs  
757 surfactin and IturinA. Surfactin had no direct inhibitory effect on *P. infestans*  
758 mycelium growth, While IturinA could cause *P. infestans* cell membrane disruption,  
759 induce cellular ROS generation and, most importantly, lead to mitochondrial damage,  
760 blocking ATP production. All the results above highlight that *B. subtilis* WL-2 and its  
761 IturinA lipopeptides have great potential for inhibiting *P. infestans* mycelium growth  
762 and controlling the development of potato late blight in the future.

763 In this article, we have performed many studies on controlling potato late blight using  
764 CLPs; however, many issues are worth resolving. For instance, the indirect inhibition  
765 effects and the differences among surfactin, Iturin, and fengycin in triggering the ISR  
766 in potato plants are still unknown. The inducer from pathogens aimed at CLPs seems  
767 to be specific for one of the CLPs subfamilies, for example, *Fusarium oxysporum*  
768 significantly induced fengycin production by *B. amyloliquefaciens* SQR9, while when

769 strain SQR9 was induced by other pathogens (*Rhizoctonia solani* and *Fusarium*  
770 *solani*), surfactin production increased obviously, and fengycin secretion decreased  
771 significantly(99). Therefore, this specific inducing phenomenon with a potentially  
772 high impact for biological control is well worth knowing in future. Cooperation of  
773 surfactin with iturin or fengycin is still a controversial issue. Parent Zihalirwa  
774 Kulimushi once suggested that surfactin from *B. amyloliquefaciens* FZB42 could  
775 somehow interfere with fengycin activity against *Rhizomucor variabilis*(89).  
776 Additionally, a mixture the CLPs surfactin and fengycin against *Verticillium dahlia*  
777 and *Rhizopus stolonifer* also lost the inhibitory effect of fengycin on spore  
778 germination and hyphal growth(100, 101). This phenomenon may be explained by the  
779 stabilizing effect of surfactin on certain lipid bilayers(101, 102) and by the inactive  
780 complexes formed by coaggregation of surfactin and fengycin(103). In contrast, the  
781 cooperation of surfactin with iturin and fengycin extracted from *Bacillus velezensis*  
782 (Y6 and F7) against *Ralstonia solanacearum* and *F. oxysporum* displayed an  
783 obviously improved antifungal effect(61). Therefore, the relationship of surfactin and  
784 iturin regarding inhibition of *P. infestans* should also be investigated in future  
785 research.

## 786 **ACKNOWLEDGMENTS**

787 This research was supported by the Agriculture Special Scientific Research Program  
788 of China (grant No. 201303018 to Jizhi Jiang), the Natural Science Foundation  
789 Program of China (grant No. C11474083 to Yanqing Wu), the Natural Science  
790 Foundation Program of Hebei Province of China (grant No. C2015201231 to Jizhi

791 Jiang), and the Hebei University Postgraduate Innovation Program (grant No.  
792 X2016073 to Youyou Wang).

### 793 REFERENCES

- 794 1. Schepers HTAM, Kessel GJT, Lucca F, Förch MG, van den Bosch GBM,  
795 Topper CG, Evenhuis A. 2018. Reduced efficacy of fluazinam against  
796 *Phytophthora infestans* in the Netherlands. Eur J Plant Pathol 151:947-960.
- 797 2. Dey T, Saville A, Myers K, Tewari S, Cooke DEL, Tripathy S, Fry WE,  
798 Ristaino JB, Guha Roy S. 2018. Large sub-clonal variation in *Phytophthora*  
799 *infestans* from recent severe late blight epidemics in India. Sci Rep 8:4429.
- 800 3. Wang YY. 2018. The study of antagonistic bacteria WL2 against  
801 *Phytophthora infestans* and its lipopeptides on disease prevention and growth  
802 promotion. Hebei University.
- 803 4. Jin GH, Li XZ, Wang YC, Wang T. 2017. Effects of inter-annual drought on  
804 the complexity of physiological races of *Phytophthora infestans*. Plant  
805 Protection 43:167-173.
- 806 5. Fukue Y, Akino S, Osawa H, Kondo N. 2018. Races of *Phytophthora*  
807 *infestans* isolated from potato in Hokkaido, Japan. J Gen Plant Pathol  
808 84:276-278.
- 809 6. Bajwa R, Khalid A, Cheema TS. 2003. Antifungal activity of allelopathic  
810 plant extracts III: growth response of some pathogenic fungi to aqueous  
811 extract of *Parthenium hysterophorus*. Plant Pathol J 2:145-156.
- 812 7. Raj MK, Kanwar SS. 2015. Lipopeptides as the antifungal and antibacterial

- 813 agents: applications in food safety and therapeutics. *Biomed Res Int*  
814 2015:473050.
- 815 8. Kim HJ, Choi HS, Yang SY, Kim IS, Yamaguchi T, Sohng JK, Park SK, Kim  
816 JC, Lee CH, Gardener BM, Kim YC. 2014. Both extracellular chitinase and a  
817 new cyclic lipopeptide, chromobactomycin, contribute to the biocontrol  
818 activity of *Chromobacterium* sp. C61. *Mol Plant Pathol* 15:122-132.
- 819 9. Ongena M, Jacques P. 2008. *Bacillus* lipopeptides: versatile weapons for plant  
820 disease biocontrol. *Trends Microbiol* 16:115-125.
- 821 10. Aranda FJ, Teruel JA, Ortiz A. 2005. Further aspects on the hemolytic activity  
822 of the antibiotic lipopeptide iturin A. *Biochim Biophys Acta* 1713:51-56.
- 823 11. Zhang QX, Zhang Y, Shan HH, Tong YH, Chen XJ, Liu FQ. 2017. Isolation  
824 and identification of antifungal peptides from *Bacillus amyloliquefaciens* W10.  
825 *Environ Sci Pollut Res Int* 24:25000-25009.
- 826 12. Tsuge K, Akiyama T, Shoda M. 2001. Cloning, sequencing, and  
827 characterization of the IturinA operon. *J Bacteriol* 183:6265-6273.
- 828 13. Alvarez F, Castro M, Príncipe A, Borioli G, Fischer S, Mori G, Jofré E. 2015.  
829 The plant-associated *Bacillus amyloliquefaciens* strains MEP218 and ARP23  
830 capable of producing the cyclic lipopeptides iturin or surfactin and fengycin  
831 are effective in biocontrol of sclerotinia stem rot disease. *J Appl Microbiol*  
832 112:159-174.
- 833 14. Ben Abdallah D, Frikha-Gargouri O, Tounsi S. 2015. *Bacillus*  
834 *amyloliquefaciens* strain 32a as a source of lipopeptides for biocontrol of

- 835 *Agrobacterium tumefaciens* strains. J Appl Microbiol 119:196–207.
- 836 15. Zeriuoh H, de Vicente A, Perez-Garcia A, Romero D. 2014. Surfactin triggers  
837 biofilm formation of *Bacillus subtilis* in melon phylloplane and contributes to  
838 the biocontrol activity. Environ Microbiol 16:2196-211.
- 839 16. Yang H, Li X, Li X, Yu H, Shen Z. 2015. Identification of lipopeptide  
840 isoforms by MALDI-TOF-MS/MS based on the simultaneous purification of  
841 iturin, fengycin, and surfactin by RP-HPLC. Anal Bioanal Chem  
842 407:2529-2542.
- 843 17. Zhang L, Sun C. 2018. Cyclic lipopeptides fengycins from marine bacterium  
844 *Bacillus subtilis* kill plant pathogenic fungus *Magnaporthe grisea* by inducing  
845 reactive oxygen species production and chromatin condensation. Appl Environ  
846 Microbiol 84 :e00445-18.
- 847 18. Moyne AL, Shelby R, Cleveland TE, Tuzun S. 2001. Bacillomycin D: an  
848 iturin with antifungal activity against *Aspergillus flavus*. J Appl Microbiol  
849 90:622-629.
- 850 19. Kumar A, Saini S, Wray V, Nimtz M, Prakash A, Johri BN. 2012.  
851 Characterization of an antifungal compound produced by *Bacillus* sp. strain  
852 A5F that inhibits *Sclerotinia sclerotiorum*. J Basic Microbiol 52:670-678.
- 853 20. Tabbene O, Di Grazia A, Azaiez S, Ben Slimene I, Elkahoui S, Alfeddy MN,  
854 Casciaro B, Luca V, Limam F, Mangoni ML. 2015. Synergistic fungicidal  
855 activity of the lipopeptide bacillomycin D with amphotericin B against  
856 pathogenic *Candida* species. FEMS Yeast Res 15:fov022.

- 857 21. Kefi A, Ben Slimene I, Karkouch I, Rihouey C, Azaeiz S, Bejaoui M, Belaid R,  
858 Cosette P, Jouenne T, Limam F. 2015. Characterization of endophytic *Bacillus*  
859 strains from tomato plants (*Lycopersicon esculentum*) displaying antifungal  
860 activity against *Botrytis cinerea* Pers. World J Microbiol Biotechnol  
861 31:1967-1976.
- 862 22. Gu Q, Yang Y, Yuan Q, Shi G, Wu L, Lou Z, Huo R, Wu H, Borriss R, Gao X.  
863 2017. Bacillomycin D produced by *Bacillus amyloliquefaciens* is involved in  
864 the antagonistic interaction with the plant-pathogenic fungus *Fusarium*  
865 *graminearum*. Appl Environ Microbiol 83:e01075-17.
- 866 23. Arrebola E, Jacobs R, Korsten L. 2010. Iturin A is the principal inhibitor in the  
867 biocontrol activity of *Bacillus amyloliquefaciens* PPCB004 against postharvest  
868 fungal pathogens. J Appl Microbiol 108:386-95.
- 869 24. Wang YY, Jiang JZ, Li Y, Zhang YH, Sun H, Lang YF. 2017. Inhibition  
870 comparison of six antagonistic bacteria against *Phytophthora infestans*.  
871 Journal of Hebei University(Natural Science Edition) 37:169-175.
- 872 25. Ali GS, El-Sayed AS, Patel JS, Green KB, Ali M, Brennan M, Norman D.  
873 2015. *Ex Vivo* application of secreted metabolites produced by soil-inhabiting  
874 *Bacillus* spp. efficiently controls foliar diseases caused by *Alternaria* spp.  
875 Appl Environ Microbiol 82:478-490.
- 876 26. Bayston K, Tomlinson M, Cohen J. 1992. In-vitro stimulation of TNF- $\alpha$  from  
877 human whole blood by cell-free supernatants of Gram-positive bacteria.  
878 Cytokine 4:397-402.



- 879 27. Ndlovu T, Rautenbach M, Vosloo JA, Khan S, Khan W. 2017.  
880 Characterisation and antimicrobial activity of biosurfactant extracts produced  
881 by *Bacillus amyloliquefaciens* and *Pseudomonas aeruginosa* isolated from a  
882 wastewater treatment plant. *AMB Express* 7:108.
- 883 28. Huang YJ , Jiang JZ, Feng LN, Tian Y, Zhao S. 2014. Inhibition comparison  
884 of several antagonists against *Phytophthora infestans*. *Journal of Hebei*  
885 *Agricultural University* 37:80-85.
- 886 29. Kunova A, Bonaldi M, Saracchi M, Pizzatti C, Chen XY, Cortesi P. 2016.  
887 Selection of *Streptomyces* against soil borne fungal pathogens by a  
888 standardized dual culture assay and evaluation of their effects on seed  
889 germination and plant growth. *BMC Microbiol* 16:272.
- 890 30. Ding T, Su B, Chen X, Xie S, Gu S, Wang Q, Huang D, Jiang H. 2017. An  
891 endophytic bacterial strain isolated from *Eucommia ulmoides* inhibits southern  
892 corn leaf blight. *Front Microbiol* 8:903.
- 893 31. Jiang JZ, Liang TY, Wang HY, Wang XZ. 2013. Screening of antagonistic  
894 *Pseudomonas Fluorescens* against *Phytophthora infestans* and disease control  
895 *in vitro*. *Journal of Agricultural University of Hebei* 36:72-76.
- 896 32. Jiang JZ, Wang YY, Wang XN, Li LY, Wan AQ, Li M. 2017. Identification of  
897 SR13-2 strain against *Phytophthora infestans* and control of late blight on  
898 detached potato tissues. *Crops* 2017:146-150.
- 899 33. Balint-Kurti PJ, Zwonitzer JC, Wisser RJ, Carson ML, Oropeza-Rosas MA,  
900 Holland JB, Szalma SJ. 2007. Precise mapping of quantitative trait loci for

- 901 resistance to southern leaf blight, caused by *Cochliobolus heterostrophus* race  
902 O, and flowering time using advanced intercross maize lines. *Genetics*  
903 176:645-657.
- 904 34. Wu YQ, Wang YY, Wang C, Cha MY. 2018. Inhibitory effect of lipopeptide  
905 crude extract produced by *Bacillus subtilis* WL2 on *Phytophthora infestans*  
906 and its isolation and identification. *Journal of Hebei University(Natural*  
907 *Science Edition)* 38:632-639.
- 908 35. Biswas SC, Dubreil L, Marion D. 2001. Interfacial behavior of wheat  
909 puroindolines: study of adsorption at the air-water interface from surface  
910 tension measurement using wilhelmy plate method. *J Coll Interf Sci*  
911 244:245-253.
- 912 36. Ceresa C, Rinaldi M, Chiono V, Carmagnola I, Allegrone G, Fracchia L. 2016.  
913 Lipopeptides from *Bacillus subtilis* AC7 inhibit adhesion and biofilm  
914 formation of *Candida albicans* on silicone. *Antonie Van Leeuwenhoek*  
915 109:1375-1388.
- 916 37. Morikawa M, Hirata Y, Imanaka T. 2000. A study on the structure-function  
917 relationship of lipopeptide biosurfactants. *Biochim Biophys Acta* 14:211-218.
- 918 38. Huang W. 2011. Studies on degradation of oil wastewater by biosurfactant-  
919 producing bacteria. *Journal of Hunan Agricultural University(Natural Sciences)*  
920 37:461-464.
- 921 39. Sen S, Borah SN, Bora A, Deka S. 2017. Production, characterization, and  
922 antifungal activity of a biosurfactant produced by *Rhodotorula babjevae* YS3.

- 923            Microb Cell Fact 16:95.
- 924    40.    Landy M, Warren GH, Rosenman SB, Colio LG. 1948. Bacillomycin: an  
925            antibiotic from *Bacillus subtilis* active against pathogenic fungi. Exp Biol Med  
926            67:539-541.
- 927    41.    Chen X, Zhang Y, Fu X, Li Y, Wang Q. 2016. Isolation and characterization  
928            of *Bacillus amyloliquefaciens* PG12 for the biological control of apple ring rot.  
929            Postharvest Biol Technol 115:113-121.
- 930    42.    Jiang J, Gao L, Bie X, Lu Z, Liu H, Zhang C, Lu F, Zhao H. 2016.  
931            Identification of novel surfactin derivatives from NRPS modification of  
932            *Bacillus subtilis* and its antifungal activity against *Fusarium moniliforme*.  
933            BMC Microbiol 16:31.
- 934    43.    Bauer AW, Kirby WM, Sherris JC, Turck M. 1966. Antibiotic susceptibility  
935            testing by a standardized single disk method. Am J Clin Pathol 45:493-496.
- 936    44.    Perez KJ, Viana JD, Lopes FC, Pereira JQ, Dos Santos DM, Oliveira JS,  
937            Velho RV, Crispim SM, Nicoli JR, Brandelli A, Nardi RM. 2017. *Bacillus* spp.  
938            isolated from puba as a source of biosurfactants and antimicrobial lipopeptides.  
939            Front Microbiol 8:61.
- 940    45.    Fan H, Zhang Z, Li Y, Zhang X, Duan Y, Wang Q. 2017. Biocontrol of  
941            bacterial fruit blotch by *Bacillus subtilis* 9407 via surfactin-mediated  
942            antibacterial activity and colonization. Front Microbiol 8:1973.
- 943    46.    Simionato AS, Navarro MOP, de Jesus MLA, Barazetti AR, da Silva CS,  
944            Simoes GC, Balbi-Pena MI, de Mello JCP, Panagio LA, de Almeida RSC,

- 945 Andrade G, de Oliveira AG. 2017. The effect of phenazine-1-carboxylic acid  
946 on mycelial growth of *Botrytis cinerea* produced by *Pseudomonas aeruginosa*  
947 LV strain. *Front Microbiol* 8:1102.
- 948 47. Jha SS, Joshi SJ, S JG. 2016. Lipopeptide production by *Bacillus subtilis* R1  
949 and its possible applications. *Braz J Microbiol* 47:955-964.
- 950 48. Jemil N, Ben Ayed H, Manresa A, Nasri M, Hmidet N. 2017. Antioxidant  
951 properties, antimicrobial and anti-adhesive activities of DCS1 lipopeptides  
952 from *Bacillus methylotrophicus* DCS1. *BMC Microbiol* 17:144.
- 953 49. Parthipan P, Preetham E, Machuca LL, Rahman PK, Murugan K, Rajasekar A.  
954 2017. Biosurfactant and degradative enzymes mediated crude oil degradation  
955 by bacterium *Bacillus subtilis* A1. *Front Microbiol* 8:193.
- 956 50. Asari S, Ongena M, Debois D, De Pauw E, Chen K, Bejai S, Meijer J. 2017.  
957 Insights into the molecular basis of biocontrol of *Brassica* pathogens by  
958 *Bacillus amyloliquefaciens* UCMB5113 lipopeptides. *Ann Bot* 120:551-562.
- 959 51. Gong AD, Li HP, Yuan QS, Song XS, Yao W, He WJ, Zhang JB, Liao YC.  
960 2015. Antagonistic mechanism of iturin A and plipastatin A from *Bacillus*  
961 *amyloliquefaciens* S76-3 from wheat spikes against *Fusarium graminearum*.  
962 *PLoS One* 10:e0116871.
- 963 52. Wang YY, Jiang JZ, Li M, Wang XN, Wu YQ. 2017. Comparative study on  
964 inhibition of several antagonistic bacteria against spore germination of  
965 *Phytophthora infestans*. *China Plant Protection* 37:16-23.
- 966 53. Cui ZN, Li YS, Hu DK, Tian H, Jiang JZ, Wang Y, Yan XJ. 2016. Synthesis

- 967 and fungicidal activity of novel 2,5-disubstituted-1,3,4-thiadiazole derivatives  
968 containing 5-phenyl-2-furan. *Sci Rep* 6:20204.
- 969 54. Huiskonen JT. 2018. Image processing for cryogenic transmission electron  
970 microscopy of symmetry-mismatched complexes. *Biosci Rep* 38:BSR  
971 20170203.
- 972 55. Tang H, Chen W, Dou ZM, Chen R, Hu Y, Chen W, Chen H. 2017.  
973 Antimicrobial effect of black pepper petroleum ether extract for the  
974 morphology of *Listeria monocytogenes* and *Salmonella typhimurium*. *J Food*  
975 *Sci Technol* 54:2067-2076.
- 976 56. Zhao P, Quan C, Wang Y, Wang J, Fan S. 2014. *Bacillus amyloliquefaciens*  
977 Q-426 as a potential biocontrol agent against *Fusarium oxysporum* f. sp.  
978 *spinaciae*. *J Basic Microbiol* 54:448-56.
- 979 57. Li X, Zhang Y, Wei Z, Guan Z, Cai Y, Liao X. 2016. Antifungal activity of  
980 isolated *Bacillus amyloliquefaciens* SYBC H47 for the biocontrol of peach  
981 gummosis. *PLoS One* 11:e0162125.
- 982 58. Cui Y, Zhao Y, Tian Y, Zhang W, Lü X, Jiang X. 2012. The molecular  
983 mechanism of action of bactericidal gold nanoparticles on *Escherichia coli*.  
984 *Biomaterials* 33:2327-2333.
- 985 59. Tian F, Li B, Ji B, Zhang G, Luo Y. 2009. Identification and structure-activity  
986 relationship of gallotannins separated from *Galla chinensis*. *LWT Food Sci*  
987 *Technol* 42:1289-1295.
- 988 60. Dolezalova E, Lukes P. 2015. Membrane damage and active but nonculturable

- 989 state in liquid cultures of *Escherichia coli* treated with an atmospheric  
990 pressure plasma jet. *Bioelectrochemistry* 103:7-14.
- 991 61. Kobayashi D, Kondo K, Uehara N, Otokozawa S, Tsuji N, Yagihashi A,  
992 Watanabe N. 2002. Endogenous reactive oxygen species is an important  
993 mediator of miconazole antifungal effect. *Antimicrob Agents Ch*  
994 46:3113-3117.
- 995 62. Tian J, Gan Y, Pan C, Zhang M, Wang XY, Tang XD, Peng X. 2018.  
996 Nerol-induced apoptosis associated with the generation of ROS and Ca<sup>2+</sup>  
997 overload in saprotrophic fungus *Aspergillus flavus*. *Appl Microbiol Biotechnol*  
998 102:6659.
- 999 63. Salvioli S, Ardizzoni A, Franceschi C, Cossarizza A. 1997. JC-1, but not  
1000 DiOC<sub>6</sub>(3) or rhodamine 123, is a reliable fluorescent probe to assess delta psi  
1001 changes in intact cells: implications for studies on mitochondrial functionality  
1002 during apoptosis. *FEBS Lett* 411:77-82.
- 1003 64. Pushpanathan M, Gunasekaran P, Rajendhran J. 2013. Mechanisms of the  
1004 antifungal action of marine metagenome-derived peptide, MMGP1, against  
1005 *Candida albicans*. *PLoS One* 8:e69316.
- 1006 65. Sun MT, Mei W, Zi JJ, Yan CB, Chen Y, Yu M, Xiong W. 2019. Effect of  
1007 MTERF2 on mitochondrial oxidative phosphorylation activity in human  
1008 cervical cancer HeLa cells. *Med & Pharm J Chin PLA* 31:50-55.
- 1009 66. Srere PA. 1969. Citrate synthase. *Methods Enzymol* 13:3-11.
- 1010 67. Hermann Schägger, Pfeiffer K. 2001. The ratio of oxidative phosphorylation

- 1011 complexes I-V in bovine heart mitochondria and the composition of  
1012 respiratory chain supercomplexes. *J Biol Chem* 276:37861-37867.
- 1013 68. Davies SMK, Poljak A, Duncan MW, Smythe G A, Murphy MP. 2001.  
1014 Measurement of protein carbonyls, *ortho*-and *meta*-tyrosine and oxidative  
1015 phosphorylation complex activity in mitochondria from young and old rats.  
1016 *Free Radic Biol Med* 31:181-190.
- 1017 69. James AM, Wei YH, Pang CY, Murphy MP. 1996. Altered mitochondrial  
1018 function in fibroblasts containing MELAS or MERRF mitochondrial DNA  
1019 mutations. *Biochem J* 318:401-407.
- 1020 70. Amaroli A, Ravera S, Baldini F, Benedicenti S, Panfoli I, Vergani L. 2019.  
1021 Photobiomodulation with 808-nm diode laser light promotes wound healing of  
1022 human endothelial cells through increased reactive oxygen species production  
1023 stimulating mitochondrial oxidative phosphorylation. *Lasers Med Sci*  
1024 34:495-504.
- 1025 71. Villani G, Attardi G. 2007. Polarographic assays of respiratory chain complex  
1026 activity\*. *Methods Cell Biol* 80:121-133.
- 1027 72. Hinkle PC. 2004. P/O ratios of mitochondrial oxidative phosphorylation.  
1028 *Biochim Biophys Acta* 1706:1-11.
- 1029 73. Daverey A, Pakshirajan K. 2009. Production, characterization, and properties  
1030 of sophorolipids from the yeast *Candida bombicola* using a low-cost  
1031 fermentative medium. *Appl Biochem Biotechnol* 158:663-674.
- 1032 74. Kong J, Yu S. 2007. Fourier transform infrared spectroscopic analysis of

- 1033 protein secondary structures. *Acta Biochim Biophys Sin (Shanghai)*  
1034 39:549-559.
- 1035 75. Thaniyavarn J, Roongsawang N, Kameyama T, Haruki M, Imanaka T,  
1036 Morikawa M, Kanaya S. 2003. Production and characterization of  
1037 biosurfactants from *Bacillus licheniformis* F2.2. *Biosci Biotechnol Biochem*  
1038 67:1239-1244.
- 1039 76. Kiran GS, Priyadharsini S, Sajayan A, Priyadharsini GB, Poulouse N, Selvin J.  
1040 2017. Production of lipopeptide biosurfactant by a *Marine Nesterenkonia* sp.  
1041 and its application in food industry. *Front Microbiol* 8:1138.
- 1042 77. Dehghan-Noudeh G, Housaindokht M, Bazzaz BS. 2005. Isolation,  
1043 characterization, and investigation of surface and hemolytic activities of a  
1044 lipopeptide biosurfactant produced by *Bacillus subtilis* ATTC 6633. *J*  
1045 *Microbiol* 43:272-276.
- 1046 78. Das P, Mukherjee S, Sen R. 2008. Antimicrobial potential of a lipopeptide  
1047 biosurfactant derived from a marine *Bacillus circulans*. *J Appl Microbiol*  
1048 104:1675-1684.
- 1049 79. Madeo F, Frohlich E, Ligr M, Grey M, Sigrist SJ, Wolf DH, Frohlich KU.  
1050 1999. Oxygen stress: a regulator of apoptosis in yeast. *J Cell Biol*  
1051 145:757-767.
- 1052 80. Lin Lf, Liu YL, FU S, Qu CH, Li H, Ni J. 2019. Inhibition of mitochondrial  
1053 complex function-the hepatotoxicity mechanism of emodin based on  
1054 quantitative proteomic analyses. *Cells* 8:263.



- 1055 81. Alkher H, Islam MR, Wijekoon C, Kalischuk M, Kawchuk LM, Peters RD,  
1056 Al-Mughrabi KI, Conn KL, Dobinson KF, Waterer D, Daayf F. 2015.  
1057 Characterization of *phytophthora infestans* populations in canada during  
1058 2012. Can J Plant Pathol 37:305-314.
- 1059 82. Klopper JW, Reddy MS, Kenney DS, Vavrina C, Kokalis-Burelle N,  
1060 Martinez-Ochoa N. 2004. Application for rhizobacteria in transplant  
1061 production and yield enhancement. Int Soc Hortic Sci 631:219-229.
- 1062 83. Raaijmakers JM, De Bruijn I, Nybroe O, Ongena M. 2010. Natural functions  
1063 of lipopeptides from *Bacillus* and *Pseudomonas*: more than surfactants and  
1064 antibiotics. FEMS Microbiol Rev 34:1037-1062.
- 1065 84. Caulier S, Gillis A, Colau G, Licciardi F, Liépin M, Desoignies N, Modrie P,  
1066 Legrève A, Mahillon J, Bragard C. 2018. Versatile antagonistic activities of  
1067 soil-borne *Bacillus* spp. and *Pseudomonas* spp. against *Phytophthora infestans*  
1068 and other potato pathogens. Front Microbiol 9:143.
- 1069 85. Colombo EM, Pizzatti C, Kunova A, Gardana C, Saracchi M, Cortesi P,  
1070 Pasquali M. 2019. Evaluation of in-vitro methods to select effective  
1071 *streptomycetes* against toxigenic *fusaria*. PeerJ 7:e6905.
- 1072 86. Zhang XD, Yang Q, Yu J, Zhao L, Fan JX. 2011. Research methods of single  
1073 cell protein production from potato residues of *Bacillus pumilus*. Journal of  
1074 Northeast Agricultural University 42:26-30.
- 1075 87. Gao XY, Liu Y, Miao LL, Li EW, Hou TT, Liu ZP. 2017. Mechanism of  
1076 anti-Vibrio activity of marine probiotic strain *Bacillus pumilus* H2, and

- 1077 characterization of the active substance. *AMB Express* 7:23.
- 1078 88. Torres MJ, Brandan CP, Petroselli G, Erra-Balsells R, Audisio MC. 2016.
- 1079 Antagonistic effects of *Bacillus subtilis* subsp. *subtilis* and *B.*
- 1080 *amyloliquefaciens* against *Macrophomina phaseolina*: SEM study of fungal
- 1081 changes and UV-MALDI-TOF MS analysis of their bioactive compounds.
- 1082 *Microbiol Res* 182:31-9.
- 1083 89. Zihahirwa Kulimushi P, Arguelles Arias A, Franzil L, Steels S, Ongena M.
- 1084 2017. Stimulation of fengycin-type antifungal lipopeptides in *Bacillus*
- 1085 *amyloliquefaciens* in the presence of the maize fungal pathogen *Rhizomucor*
- 1086 *variabilis*. *Front Microbiol* 8:850.
- 1087 90. Yu GY, Sinclair JB, Hartman GL, Bertagnolli BL. 2002. Production of iturin
- 1088 A by *Bacillus amyloliquefaciens* suppressing *Rhizoctonia solani*. *Soil*
- 1089 *BiolBiochem* 34:955-963.
- 1090 91. Ongena M, Jacques P, Touré Y, Destain J, Jabrane A, Thonart P. 2005.
- 1091 Involvement of fengycin-type lipopeptides in the multifaceted biocontrol
- 1092 potential of *Bacillus subtilis*. *Appl Microbiol Biotechnol* 69:29-38.
- 1093 92. Maget-Dana R, Ptak M, Peypoux F, Michel G. 1985. Pore-forming properties
- 1094 of iturin A, a lipopeptide antibiotic. *Biochim Biophys Acta* 815:405-9.
- 1095 93. Yang MM, Wen SS, Mavrodi DV, Mavrodi OV, von Wettstein D,
- 1096 Thomashow LS, Guo JH, Weller DM. 2014. Biological control of wheat root
- 1097 diseases by the CLP-producing strain *Pseudomonas fluorescens* HC1-07.
- 1098 *Phytopathology* 104:248-56.

- 1099 94. de Bruijn I, de Kock MJ, Yang M, de Waard P, van Beek TA, Raaijmakers JM.  
1100 2007. Genome-based discovery, structure prediction and functional analysis of  
1101 cyclic lipopeptide antibiotics in *Pseudomonas* species. *Mol Microbiol*  
1102 63:417-28.
- 1103 95. Ongena M, Jourdan E, Adam A, Paquot M, Brans A, Joris B, Arpigny JL,  
1104 Thonart P. 2007. Surfactin and fengycin lipopeptides of *Bacillus subtilis* as  
1105 elicitors of induced systemic resistance in plants. *Environ Microbiol*  
1106 9:1084-90.
- 1107 96. Tran H, Ficke A, Asimwe T, Hofte M, Raaijmakers JM. 2007. Role of the  
1108 cyclic lipopeptide massetolide A in biological control of *Phytophthora*  
1109 *infestans* and in colonization of tomato plants by *Pseudomonas fluorescens*.  
1110 *New Phytol* 175:731-42.
- 1111 97. Jourdan E, Henry G, Duby F, Dommes J, Barthélemy JP, Thonart P, Ongena  
1112 M. 2009. Insights into the defense-related events occurring in plant cells  
1113 following perception of surfactin-type lipopeptide from *Bacillus subtilis*. *Mol*  
1114 *Plant Microbe Interact* 22:456-68.
- 1115 98. Zhang X, Rui L, Lv B, Chen F, Cai L. 2019. Adiponectin relieves human adult  
1116 cardiac myocytes injury induced by intermittent hypoxia. *Med Sci Monit*  
1117 25:786-793.
- 1118 99. Li B, Li Q, Xu Z, Zhang N, Shen Q, Zhang R. 2014. Responses of beneficial  
1119 *Bacillus amyloliquefaciens* SQR9 to different soilborne fungal pathogens  
1120 through the alteration of antifungal compounds production. *Front Microbiol*

1121 5:636.

1122 100. Liu J, Hagberg I, Novitsky L, Hadj-Moussa H, Avis TJ. 2014. Interaction of  
1123 antimicrobial cyclic lipopeptides from *Bacillus subtilis* influences their effect  
1124 on spore germination and membrane permeability in fungal plant pathogens.  
1125 Fungal Biol 18:855-61.

1126 101. Tao Y, Bie XM, Lv FX, Zhao HZ, Lu ZX. 2011. Antifungal activity and  
1127 mechanism of fengycin in the presence and absence of commercial surfactin  
1128 against *Rhizopus stolonifer*. J Microbiol 49:146-50.

1129 102. Grau A, Gómez Fernández JC, Peypoux F, Ortiz A. 1999. A study on the  
1130 interactions of surfactin with phospholipid vesicles. Biochim Biophys Acta  
1131 Biomembr 1418:307-19.

1132 103. Cawoy H, Debois D, Franzil L, De Pauw E, Thonart P, Ongena M. 2015.  
1133 Lipopeptides as main ingredients for inhibition of fungal phytopathogens by  
1134 *Bacillus subtilis/amyloliquefaciens*. Microb Biotechnol 8:281-95.

1135

1136

1137

1138

1139

1140

1141

1142

1143

1144

1145 **Tables**

1146 **Tab. 1 Comparison of the inhibition of *P. infestans* by three *Bacillus* species**

1147

| Strains   | Inhibition rate (%) |        |        |
|-----------|---------------------|--------|--------|
|           | LC                  | CS     | CFS    |
| 1149 WL-2 | 75.6 a              | 93.7 a | 80.7 a |
| 1150 WL-1 | 65.4 b              | 86.1 b | 56.6 b |
| 1151 W-7  | 62.5 b              | 84.2 b | 58.7 b |
| 1152 CK   | 0 c                 | 0 c    | 0 c    |

1153 Note: The different letters a, b, c, and d in the same column symbolize a significant difference  
 1154 ( $P < 0.05$ ), and the same is true below.

1155

1156

1157 **Tab. 2 Analysis of CLE using MALDI-TOF-MS**

| Lipopeptide | Fatty acid chain | Molecular formula                                               | Molecular weight ( $m/z$ ) |                     |
|-------------|------------------|-----------------------------------------------------------------|----------------------------|---------------------|
|             |                  |                                                                 | [M+H] <sup>+</sup>         | [M+Na] <sup>+</sup> |
| Surfactin   | C <sub>14</sub>  | C <sub>52</sub> H <sub>91</sub> N <sub>7</sub> O <sub>13</sub>  | 1,022.68                   | 1,044.66            |
|             | C <sub>15</sub>  | C <sub>53</sub> H <sub>93</sub> N <sub>7</sub> O <sub>13</sub>  | 1,036.69                   | 1,058.67            |
|             | C <sub>16</sub>  | C <sub>54</sub> H <sub>95</sub> N <sub>7</sub> O <sub>13</sub>  | 1,050.71                   | 1,072.69            |
|             | C <sub>17</sub>  | C <sub>55</sub> H <sub>97</sub> N <sub>7</sub> O <sub>13</sub>  | -                          | 1,086.70            |
| IturinA     | C <sub>14</sub>  | C <sub>48</sub> H <sub>74</sub> N <sub>12</sub> O <sub>14</sub> | -                          | 1,065.53            |
|             | C <sub>15</sub>  | C <sub>49</sub> H <sub>76</sub> N <sub>12</sub> O <sub>14</sub> | -                          | 1,079.55            |

1158

1159

1160 **Tab. 3 Inhibition effect of CLE on *P. infestans* mycelial growth**

1161

|      | Concentration (mg/mL) | Inhibition zone (mm) |
|------|-----------------------|----------------------|
| 1162 | CK                    | -                    |
| 1163 |                       | 0.0 a                |
| 1164 |                       | 1                    |
| 1165 |                       | 5.2 b                |
| 1166 | CLE                   | 3                    |
| 1167 |                       | 8.9 c                |
| 1168 |                       | 5                    |
| 1169 |                       | 9.3 c                |
| 1170 | Metalaxyl             | 15 µg/mL             |
| 1171 |                       | 13.6 d               |

1170

1171

1172

1173

1174

1175

**Tab. 4 Detection of purified lipopeptides**

| Lipopeptide           | Fatty acid chain | Molecular formula                                               | Calculated ( <i>m/z</i> ) |                     |                    |
|-----------------------|------------------|-----------------------------------------------------------------|---------------------------|---------------------|--------------------|
|                       |                  |                                                                 | [M+H] <sup>+</sup>        | [M+Na] <sup>+</sup> | [M+K] <sup>+</sup> |
| surfactin<br>(peak a) | C <sub>14</sub>  | C <sub>52</sub> H <sub>91</sub> N <sub>7</sub> O <sub>13</sub>  | 1,022.68                  | 1,044.66            | 1,060.68           |
|                       | C <sub>15</sub>  | C <sub>53</sub> H <sub>93</sub> N <sub>7</sub> O <sub>13</sub>  | 1,036.69                  | 1,058.67            | 1,074.64           |
|                       | C <sub>16</sub>  | C <sub>54</sub> H <sub>95</sub> N <sub>7</sub> O <sub>13</sub>  | 1,050.71                  | 1,072.69            | 1,088.66           |
|                       | C <sub>17</sub>  | C <sub>55</sub> H <sub>97</sub> N <sub>7</sub> O <sub>13</sub>  | -                         | 1,086.69            | 1,102.68           |
| IturinA<br>(peak b)   | C <sub>14</sub>  | C <sub>48</sub> H <sub>74</sub> N <sub>12</sub> O <sub>14</sub> | 1,043.55                  | 1,065.53            | 1,081.56           |
|                       | C <sub>15</sub>  | C <sub>49</sub> H <sub>76</sub> N <sub>12</sub> O <sub>14</sub> | 1,057.57                  | 1,079.55            | 1,093.56           |

1176

1177

**Tab. 5 Inhibition effect of surfactin and IturinA against *P. infestans***

1178

1179

1180

1181

1182

1183

1184

1185

1186

1187

| Concentration<br>( $\mu\text{g/mL}$ ) | Inhibition zone (mm) |         |
|---------------------------------------|----------------------|---------|
|                                       | surfactin            | IturinA |
| CK (0)                                | 0.0 a                | 0.0 a   |
| 20                                    | 0.0 a                | 4.8 b   |
| 30                                    | 0.0 a                | 7.1 c   |
| 40                                    | 0.0 a                | 10.2 d  |
| 50                                    | 0.0 a                | 10.5 d  |

1188

## 1189 Figures

1190

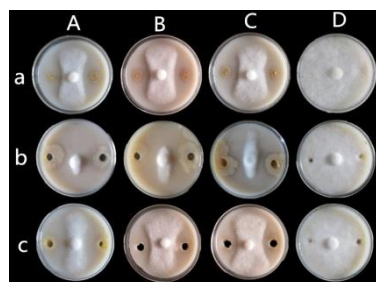

1191

1192

Note: a: LC; b: CS; c: CFS; A: WL-2; B: WL-1; C: W-7; D: Control.

1193

**Fig. 1 Comparison of three strains against *P. infestans***

1194

1195

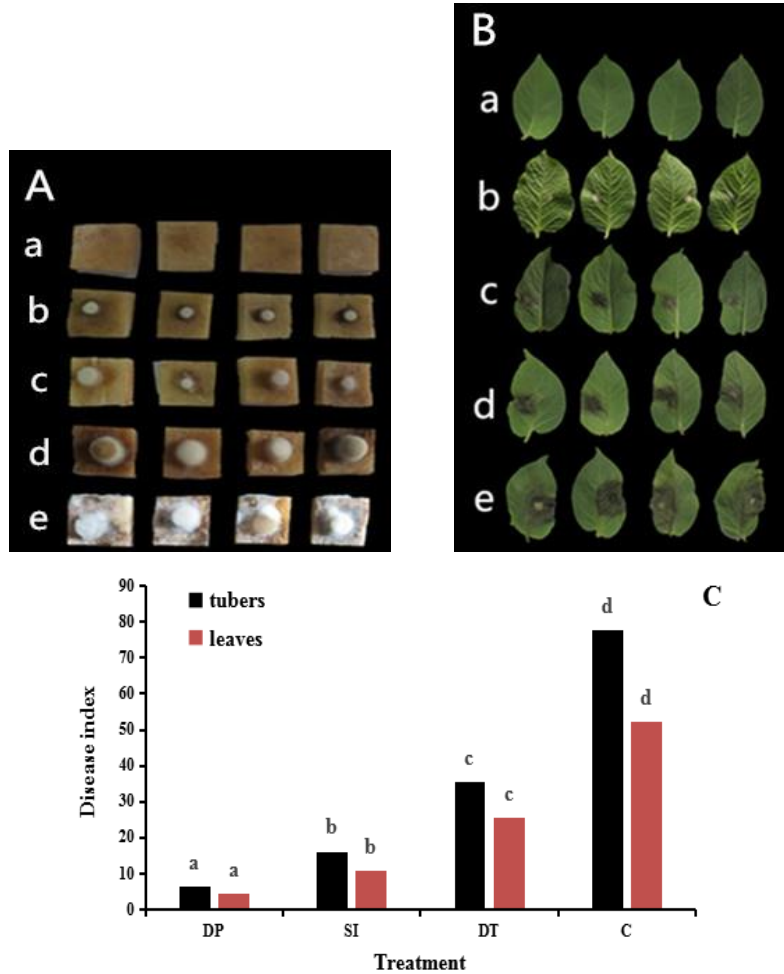

1196

1197 Note: A: *In vitro* tubers, A-a: Negative control (LB liquid medium); A-b: DP (disease prevention);  
 1198 A-c: SI (simultaneous inoculation); A-d: DT (disease therapy); A-e: Control (C, sterilized water);  
 1199 B: *In vitro* leaves; C: Comparison of disease indices. The different lowercase letters between  
 1200 different groups indicate a significant difference ( $P < 0.05$ ); the same is true below.

1201

**Fig. 2 Biocontrol effect of the WL-2 CS on potato tissues *in vitro***

1202

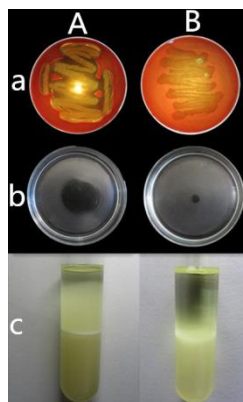

1203

1204 Note: A: Treatment group; B: Control group. a: Hemolysis activity (*E. coli* as control); b: Oil  
 1205 dispersal diameter; c: Determination of emulsification index.

1206

**Fig. 3 Determination of hemolysis, oil dispersal, and emulsification activities**

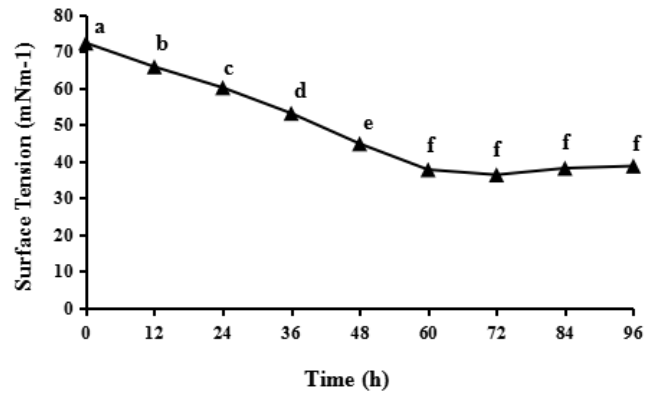

1207

1208 Note: The ST of distilled water was 73.1 mN/m.

1209

**Fig. 4 Measurement of ST**

1210

1211

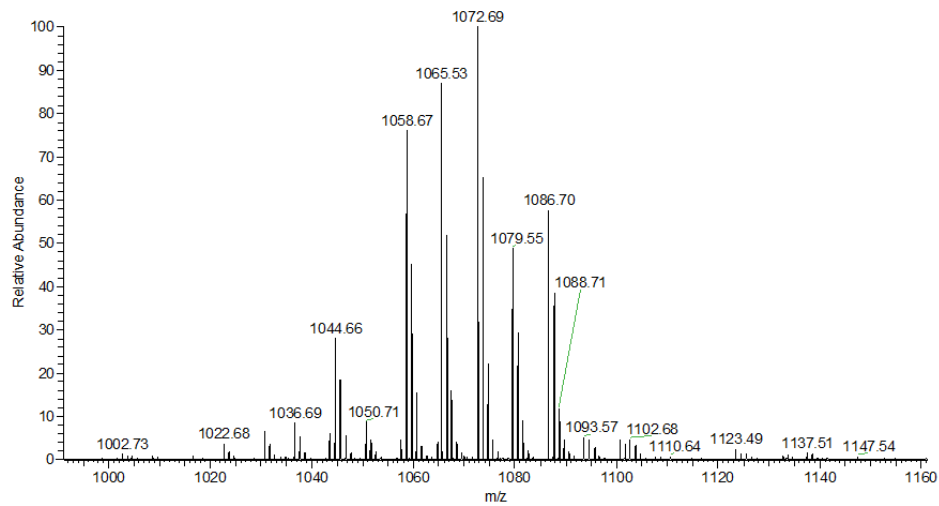

1212

1213

**Fig. 5 Analysis of CLE using MALDI-TOF-MS**

1214

1215

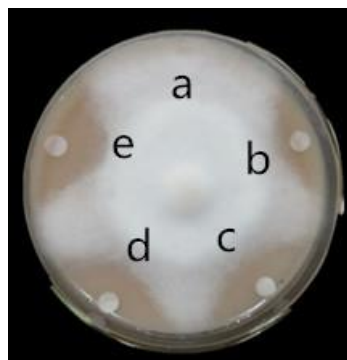

1216

1217 Note: a: Control (distilled water); b: 1 mg/mL; c: 3 mg/mL; d: 5 mg/mL; e: Metalaxyl (15  $\mu$ g/mL).

1218

**Fig. 6 Inhibition effect of CLE on mycelial growth**



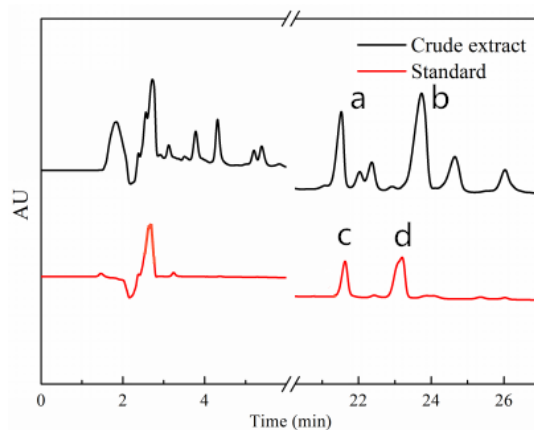

1219

1220 Note: The black line above shows the result for the CLE (peak a at 21.4 min, and peak b at 23.6  
1221 min). The red line below represents the results for standard lipopeptides; peak c at 21.6 min was  
1222 commercial surfactin, and peak d at 23.2 min was commercial iturin.

1223

**Fig. 7 Purification of CLE using HPLC system**

1224

1225

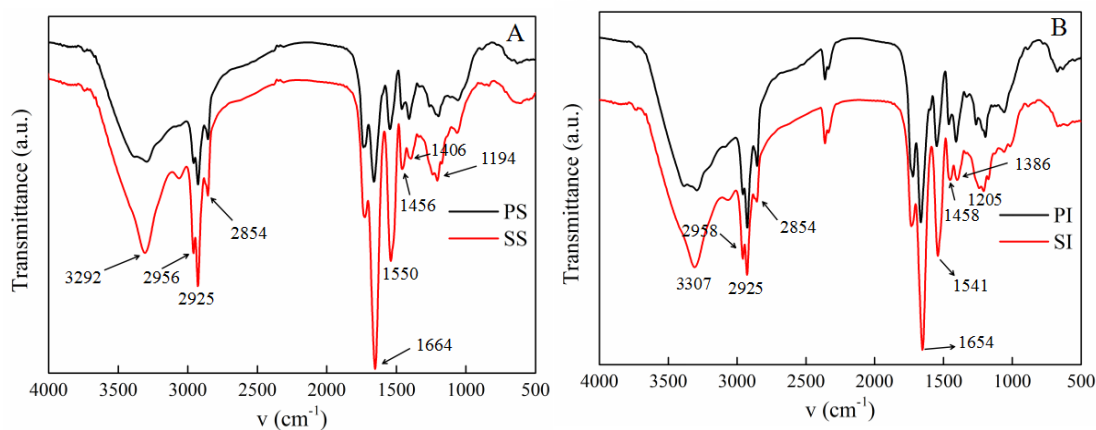

1226

1227 Note: A: Comparison of purified surfactin (PS) and standard surfactin (SS); B: Comparison of  
1228 purified IturinA (PI) and standard iturin (SI). The black line above shows the result for purified  
1229 lipopeptides, and the red line below shows the result for standard lipopeptides.

1230

**Fig. 8 FTIR analysis of purified lipopeptides**

1231

1232

1233

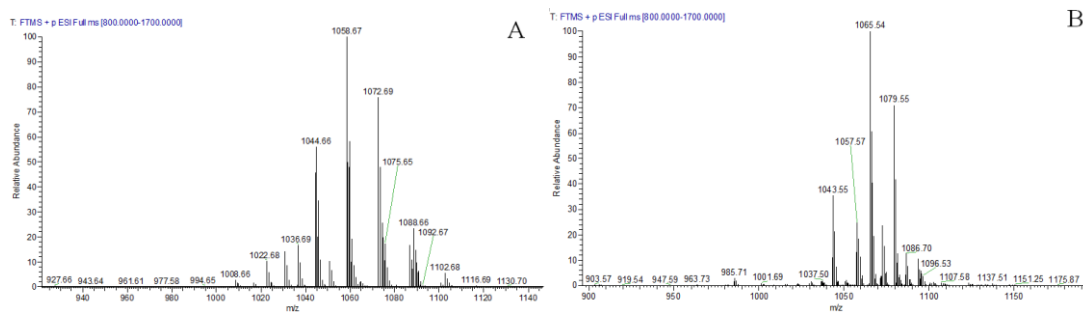

1234

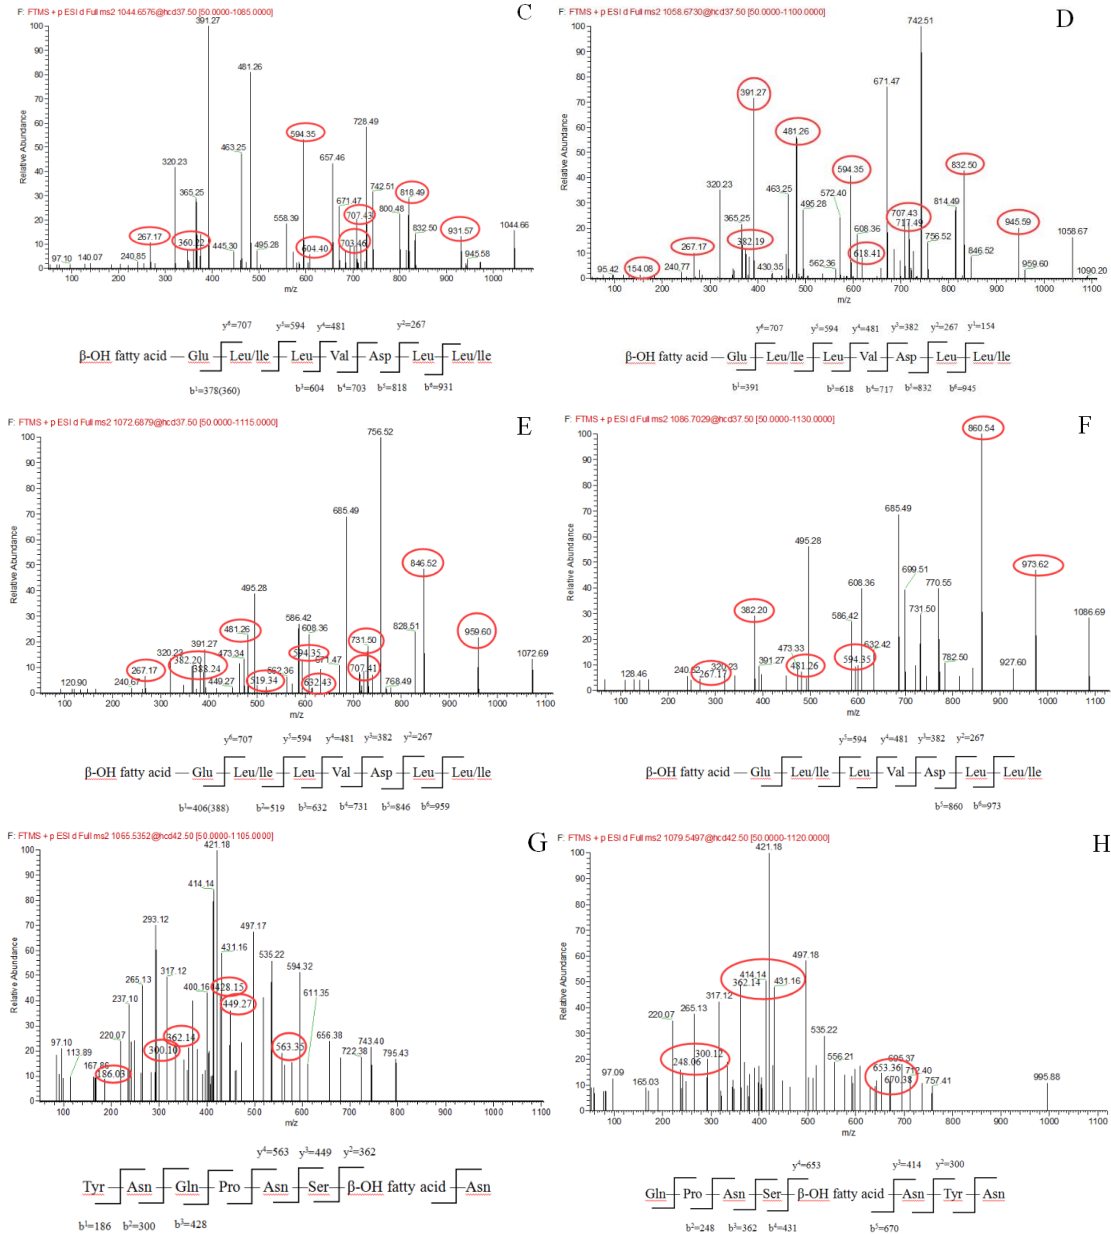

1235

1236

1237

1238

1239 Note: A: Full MS of peak a (surfactin); B: Full MS of peak b (IturinA); C-F: MS/MS spectrum of  
 1240 the surfactin C<sub>14</sub> precursor ion at *m/z* 1,044.66 [M+Na]<sup>+</sup>, surfactin C<sub>15</sub> precursor ion at *m/z*  
 1241 1,058.67 [M+Na]<sup>+</sup>, surfactin C<sub>16</sub> precursor ion at *m/z* 1,072.69 [M+Na]<sup>+</sup> and surfactin C<sub>17</sub>  
 1242 precursor ion at *m/z* 1,086.69 [M+Na]<sup>+</sup>, respectively; G-H: MS/MS spectrum of the IturinA C<sub>14</sub>  
 1243 precursor ion at *m/z* 1,065.53 [M+Na]<sup>+</sup> and spectrum of the IturinA C<sub>15</sub> precursor ion at *m/z*  
 1244 1,079.55 [M+Na]<sup>+</sup>.

**Fig. 9 Detection of purified lipopeptides using MADI-TOF-MS/MS**

1245

1246

1247

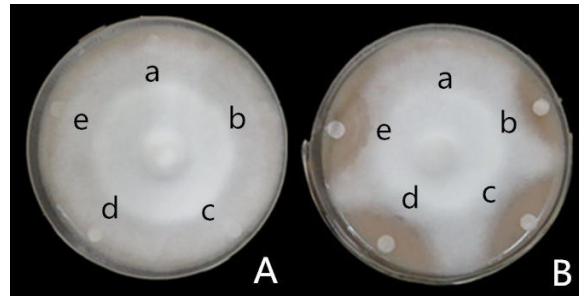

1248

1249

Note: A: Surfactin group; B: IturinA group. a: Control (distilled water); b: 20 µg/mL; c: 30 µg/mL; d: 40 µg/mL; e: 50 µg/mL.

1250

1251

**Fig. 10 Inhibition effect of purified surfactin and IturinA**

1252

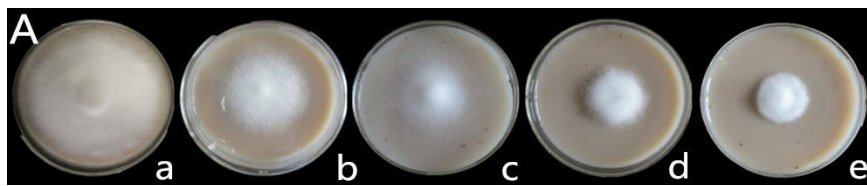

1253

1254

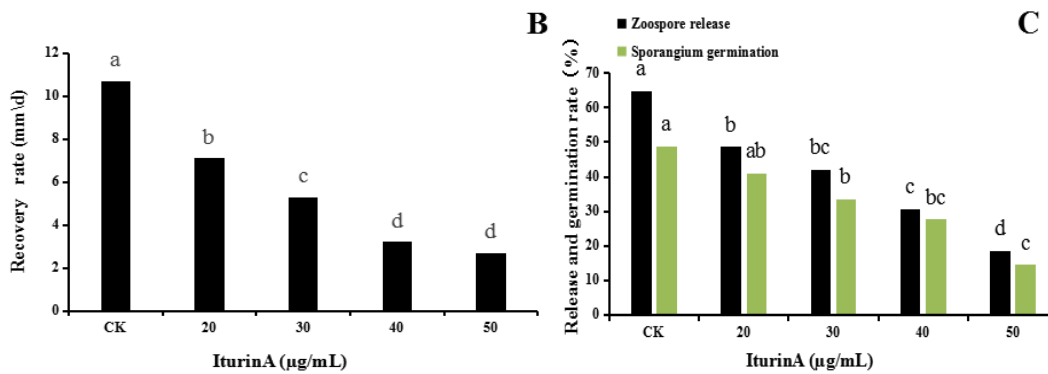

1255

1256

Note: A-a: Control (normal mycelium growth); A-b: 20 µg/mL; A-c: 30 µg/mL; A-d: 40 µg/mL; A-e: 50 µg/mL. B: Mycelium recovery rate. C: Zoospore release and direct germination rates of sporangium after inhibition. The lowercase letters indicate a comparison between the different groups.

1259

1260

**Fig. 11 The recovery of *P. infestans* mycelia and sporangia after inhibition**

1261

1262

1263

1264

1265

1266

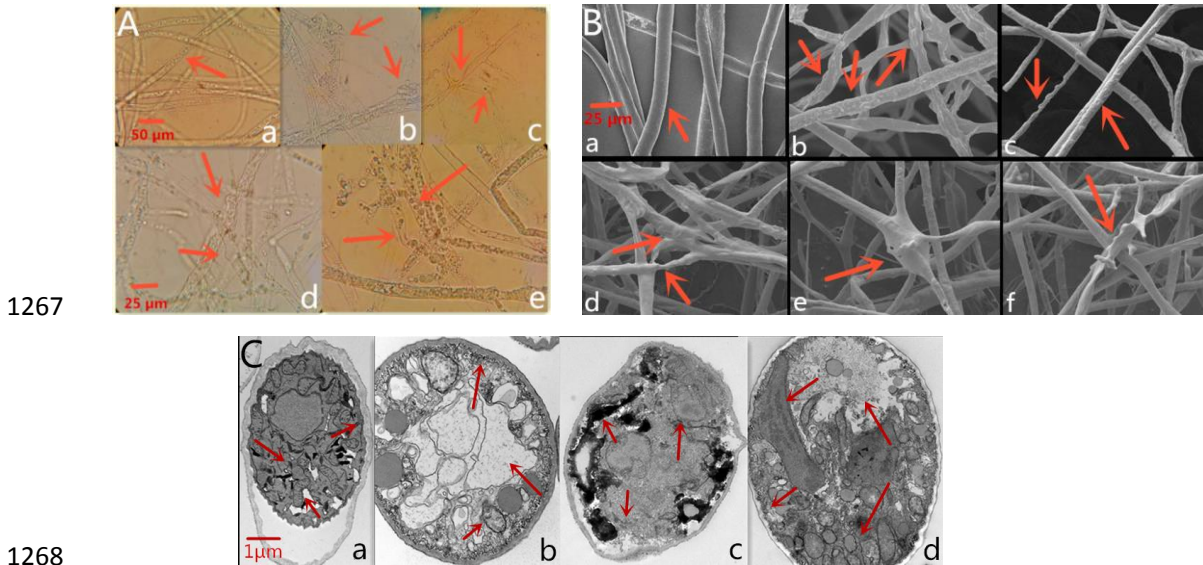

1267

1268

1269 Note: A: OM observation (a-c, bar = 50  $\mu\text{m}$ , and d-e, bar = 25  $\mu\text{m}$ ). A-a: Normal mycelium  
 1270 growth of the control, with a smooth, vimineous, straight and evenly grown mycelium; A-b:  
 1271 Mycelium twisted into clusters; A-c: Mycelium growth with unequal widths and increased  
 1272 branching; A-d: Loss of smoothness and formation of unusual surface bulges in the mycelium; A-e:  
 1273 Large vacuoles and condensed cytoplasm. B: SEM observation (bar = 25  $\mu\text{m}$ ). B-a: Straight and  
 1274 smooth mycelium (control group); B-b: Mycelium surface was rough and uneven; B-c,d:  
 1275 Mycelium was locally raised, with uneven width and roughness on the surface; B-e: Mycelium  
 1276 expansion of branches; B-f: Abnormal branches in the mycelium. C: TEM observation (bar = 1  
 1277  $\mu\text{m}$ ). C-a: Mycelium grew normally, the mycelium cell membrane was intact, organelles were  
 1278 distributed in a normal arrangement, and there were numerous mitochondria with abundant inner  
 1279 ridges (control group); C-b: Disrupted cell membrane, disordered organelles, large cavitation area  
 1280 in the center, and sparse mitochondria with few ridges; C-c: Irregular organelles and body  
 1281 accumulation; C-d: Nonintact cell membrane, large cavitation area, organelles gathered in clumps  
 1282 and shifted nucleus.

1283

**Fig. 12 *P. infestans* mycelium deformation after inhibition**

1284

1285

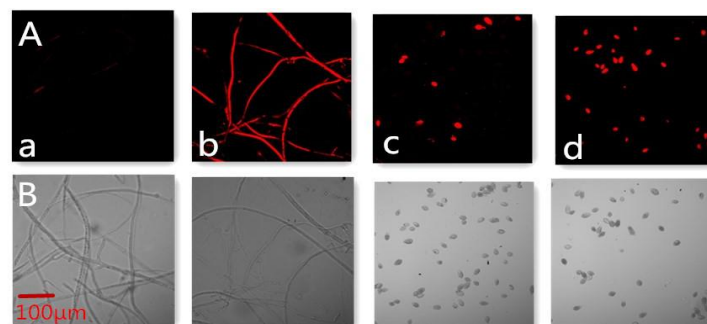

1286

1287 Note: A: Observation in the red fluorescence channel; B: Observation in the optical channel. a-b,  
 1288 Mycelium; c-d, Sporangium. IturinA in the treatment group was at a concentration of 50  $\mu\text{g}/\text{mL}$ .

1289

**Fig. 13 IturinA affects cell membrane integrity**

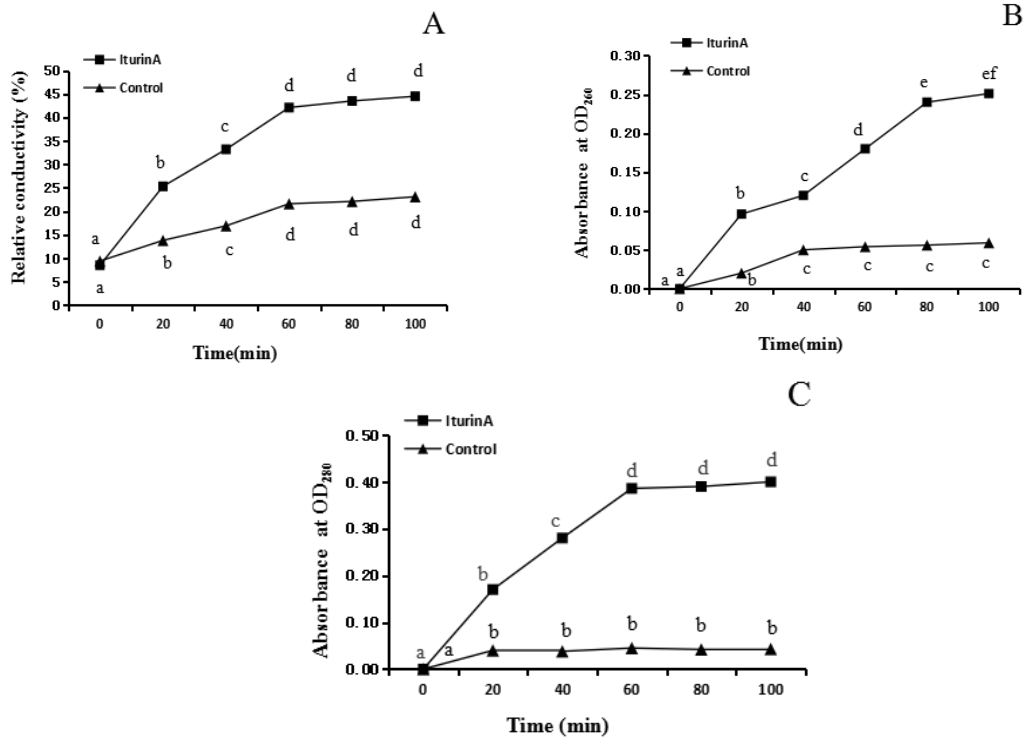

1290

1291

1292 Note: A: Relative conductivity; B: Nucleic acid leakage; C: Protein leakage. IturinA in the  
 1293 treatment group was at a concentration of 50  $\mu\text{g/mL}$ . The different letters indicate a significant  
 1294 difference ( $P < 0.05$ ).

1295

**Fig. 14 Effects of IturinA on cell membrane permeability**

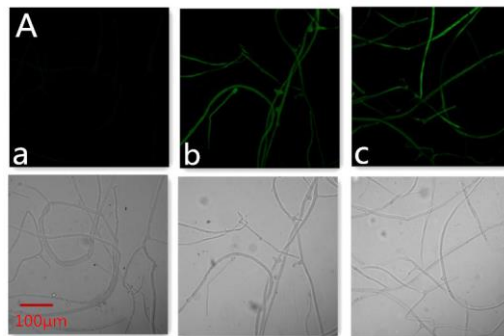

1296

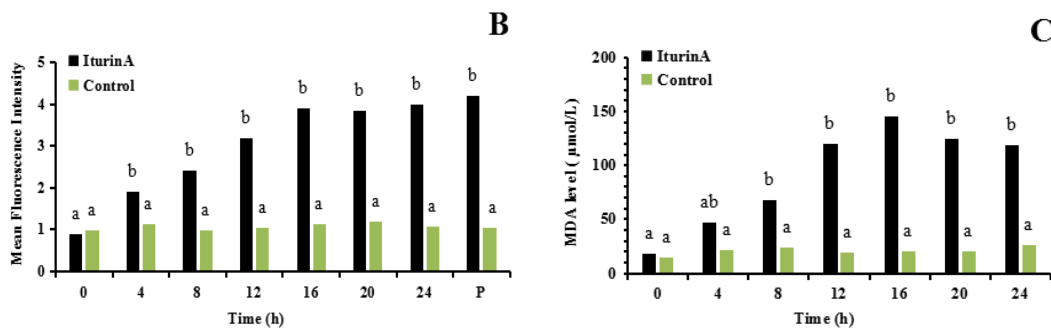

1297

1298 Note: A: ROS detection. A-a: Control, A-b: IturinA (50  $\mu\text{g/mL}$ ), generation for 16 h, A-c: Positive  
 1299 control (P, Rosup), generation for 20 min. B: Mean fluorescence intensity. C: MDA production.  
 1300 The lowercase letters indicate a comparison within the same treatment group.

1301

**Fig. 15 ROS generation and MDA production**

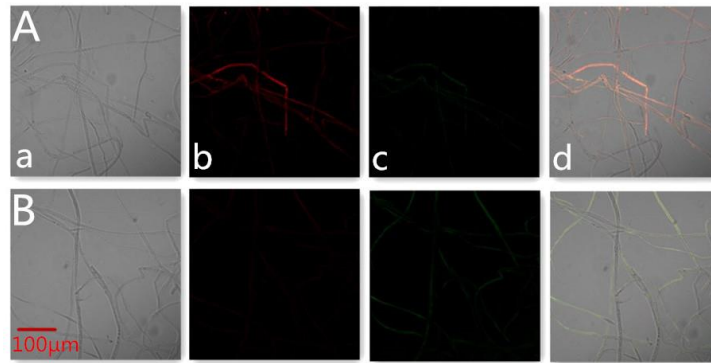

1302

1303 Note: A: Control group, B: Treatment group (IturinA). a: Optical channel; b: Red fluorescence  
1304 channel; c: Green fluorescence channel; d: Red and green channels merged.

1305

**Fig. 16 IturinA changes MMP**

1306

1307

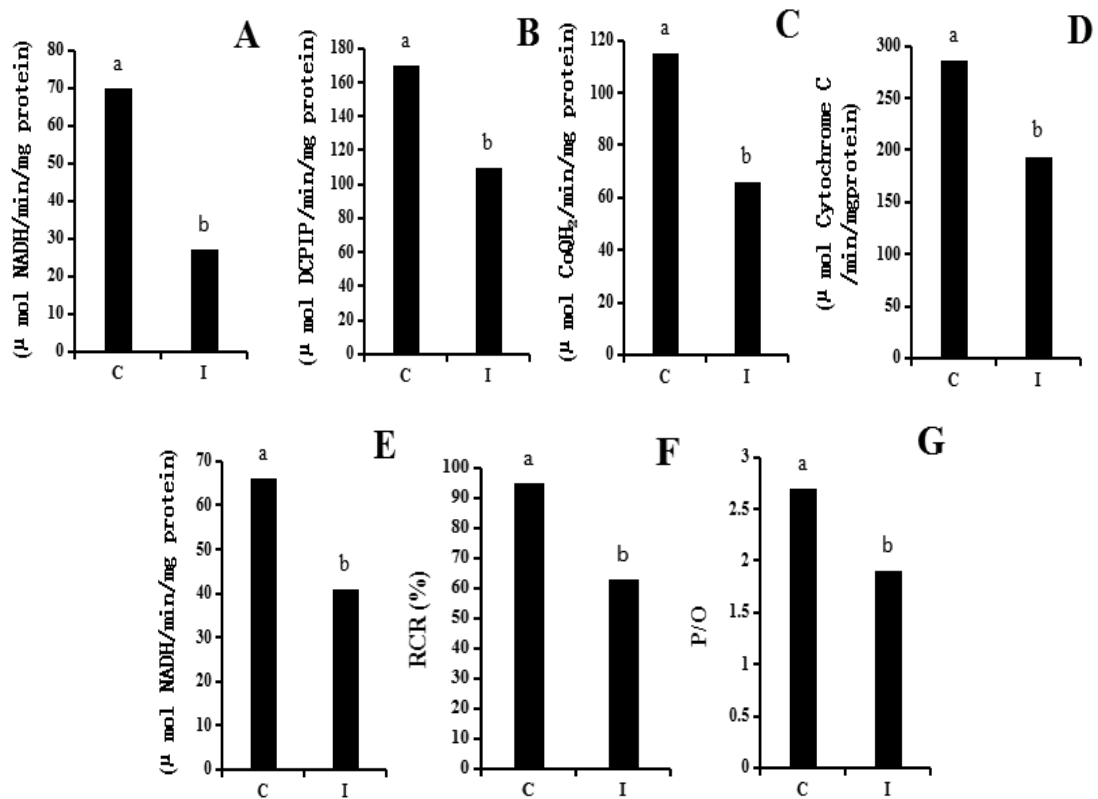

1308

1309

1310 Note: The letters C and I represent the control group and IturinA treatment group, respectively.  
1311 A-E: Complex I to Complex V, respectively. F: Respiratory control rate (RCR). G: Oxidative  
1312 phosphorylation efficiency (P/O).

1313

**Fig. 17 Detection of mitochondrial respiratory activity**
